# Supplementary material for: Cardiovascular Disease-Associated MicroRNAs as Novel Biomarkers of First-Trimester Screening for Gestational Diabetes Mellitus in the Absence of Other Pregnancy-Related Complications
Source: MDPI journal article supplement (doi:10.3390/ijms231810635), 2022-09-13
Supplement: s1 [file s1]

Supplementary Figure S4.

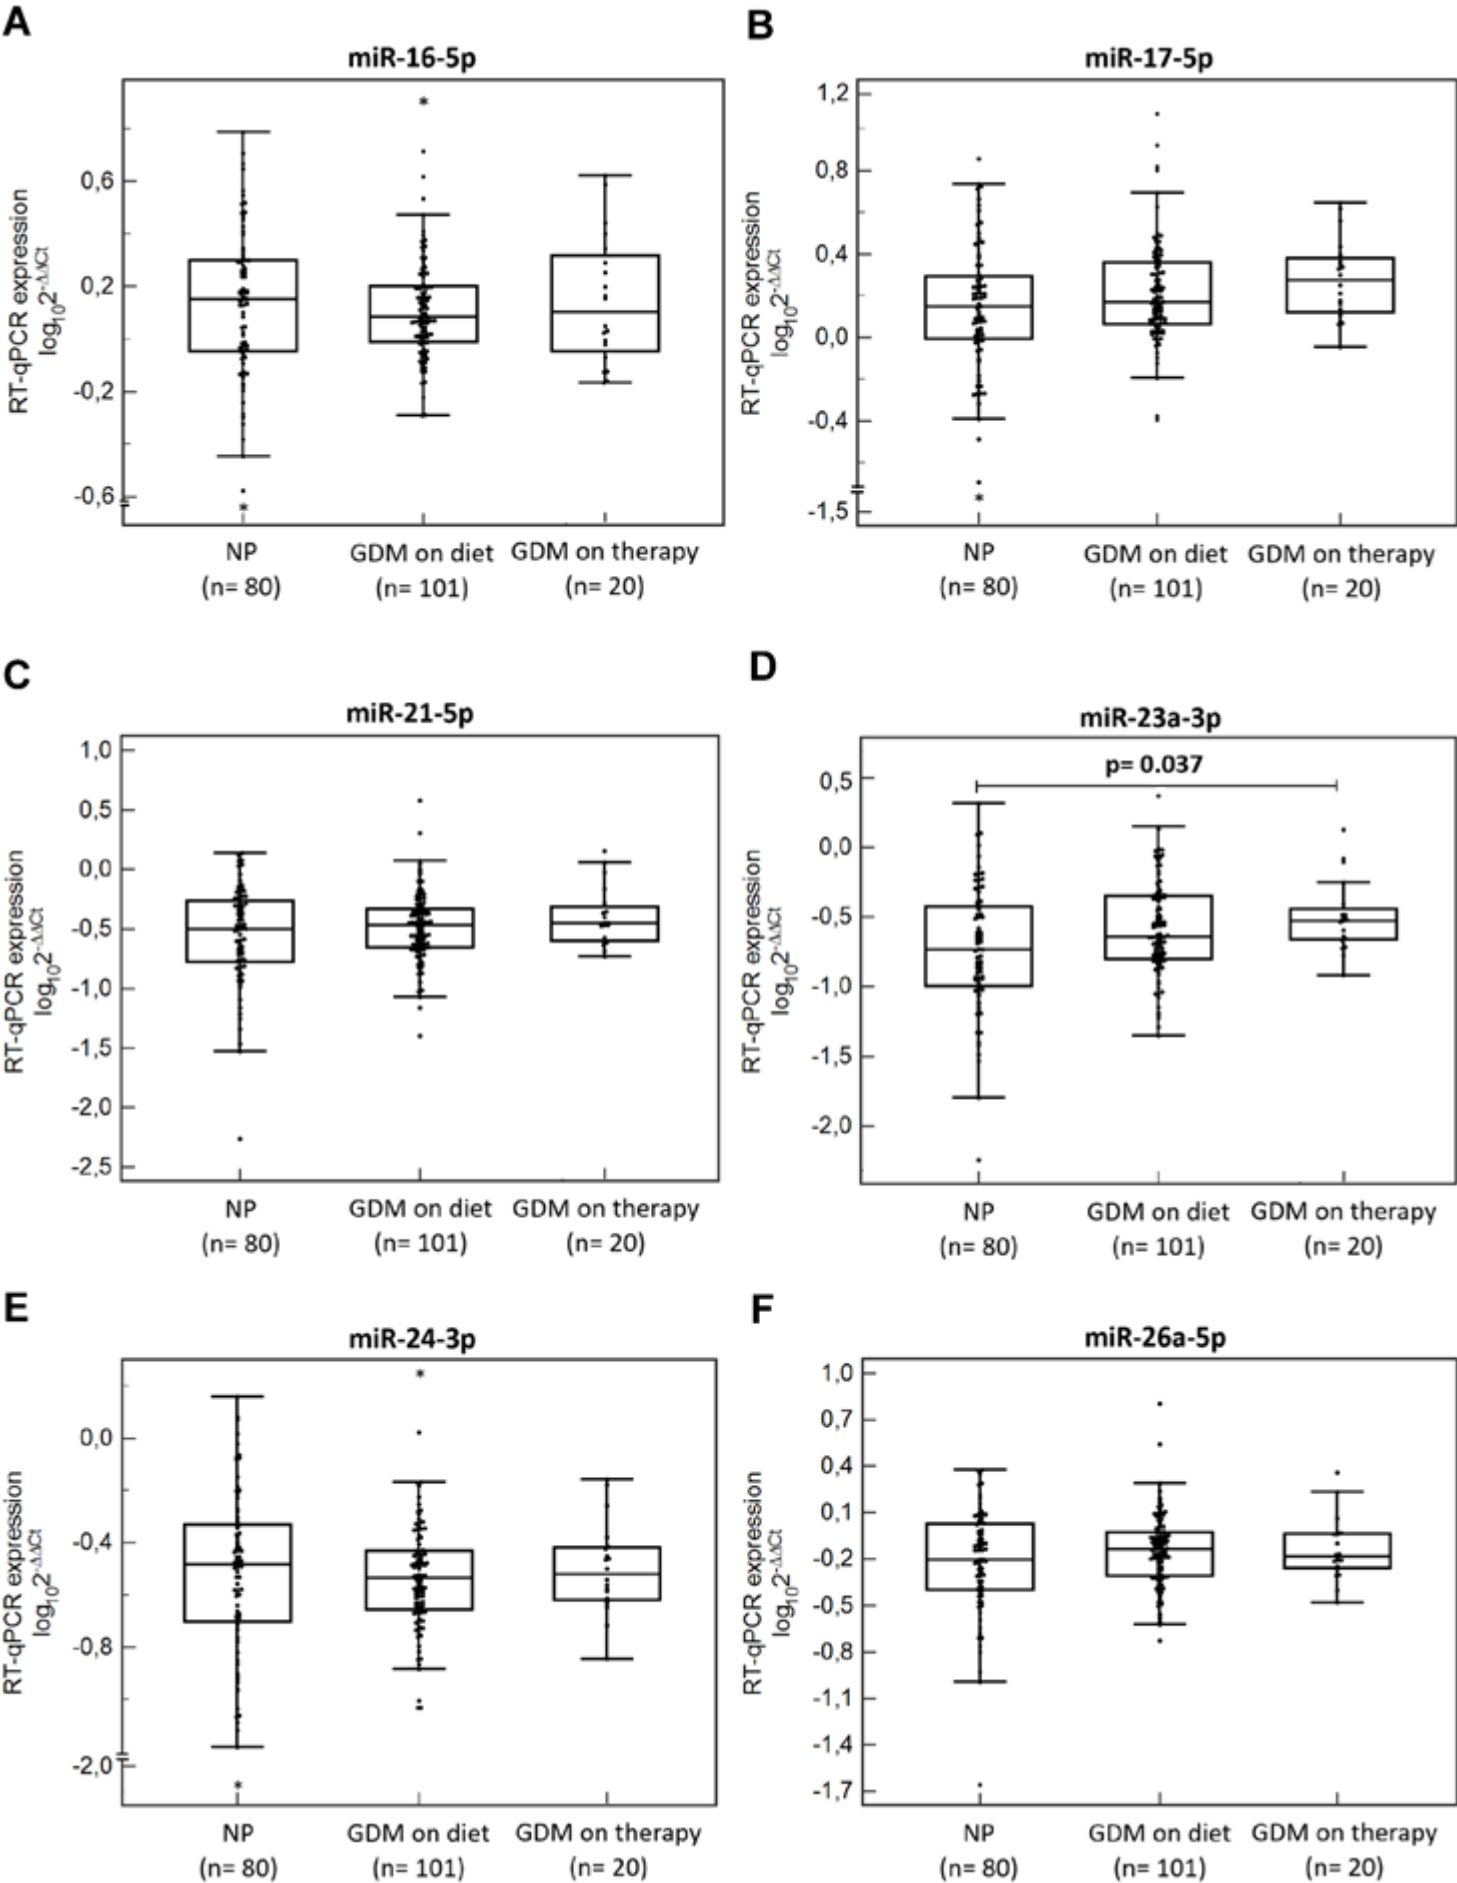

**G**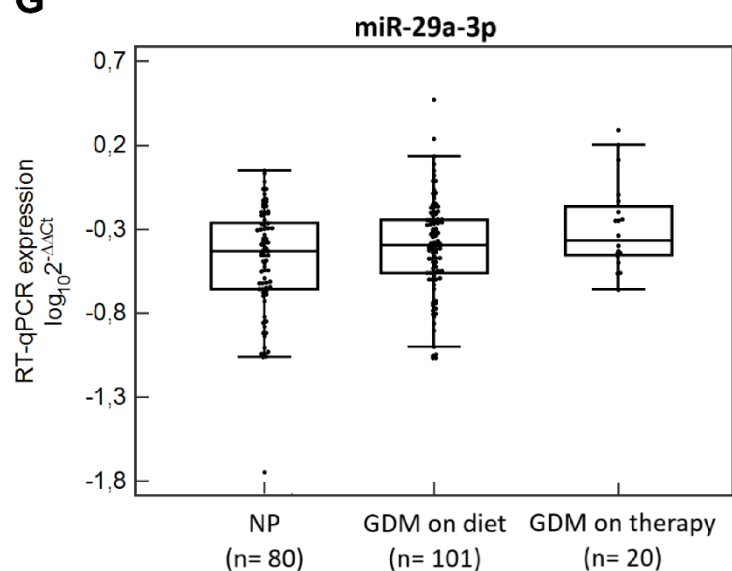**H**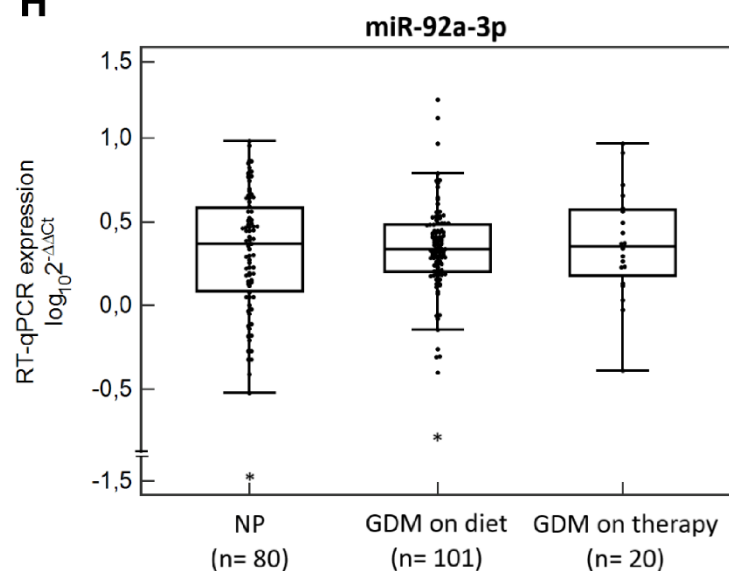**I**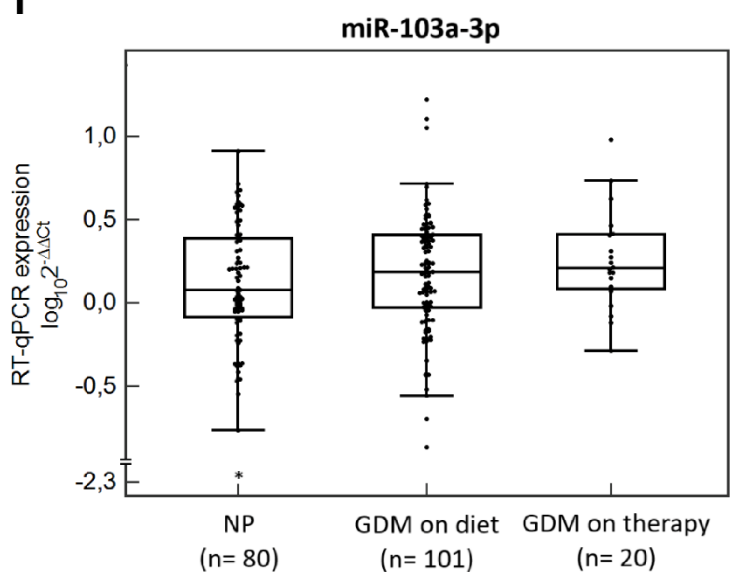**J**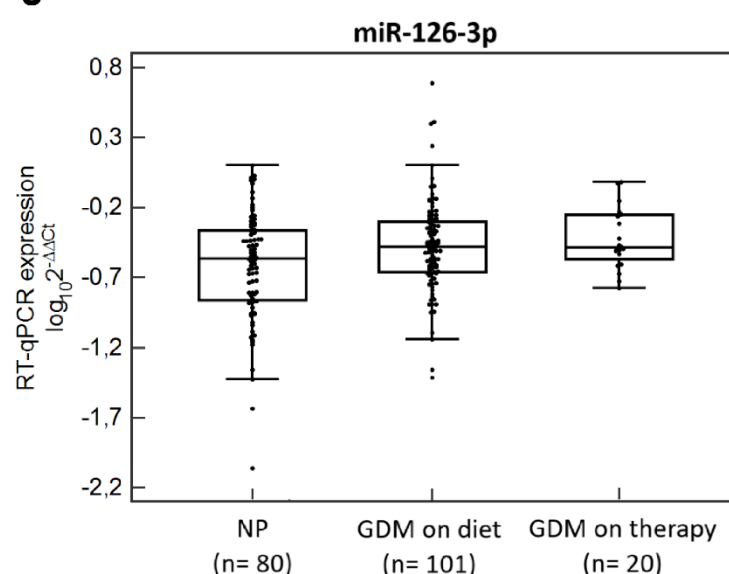**K**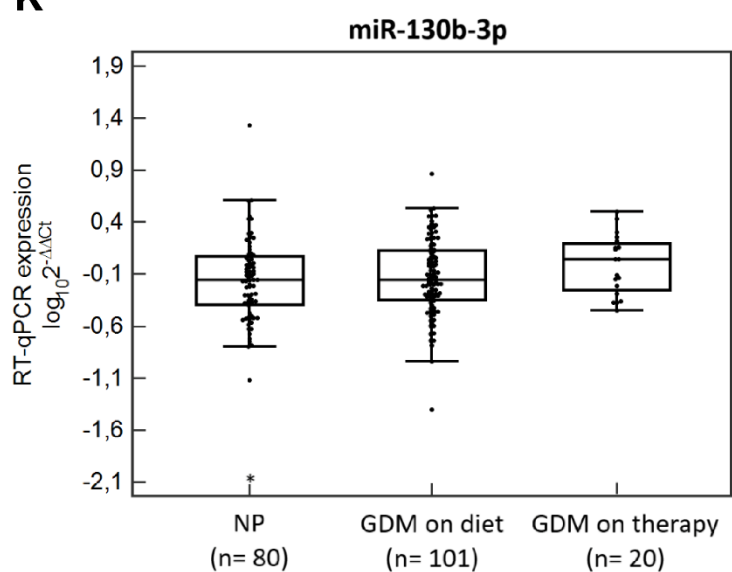**L**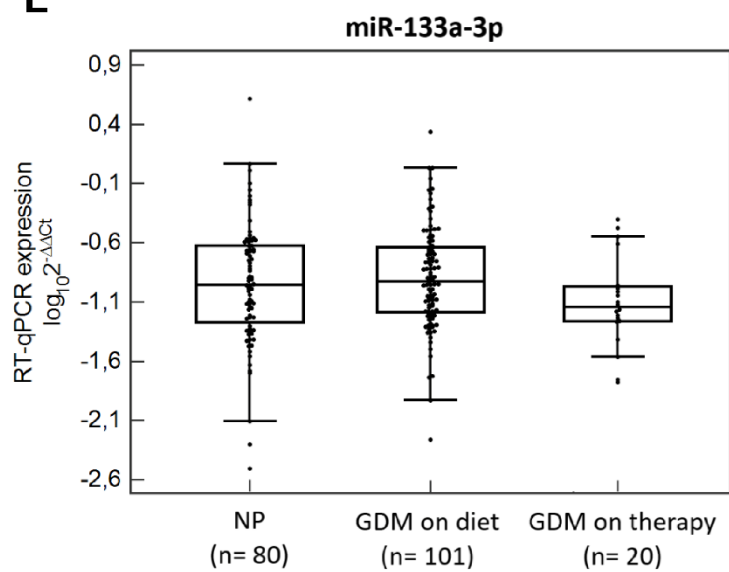

**M**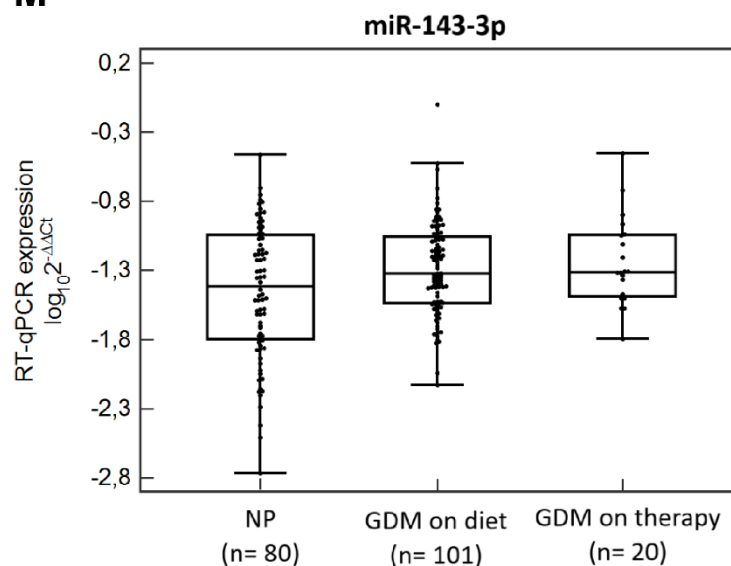**N**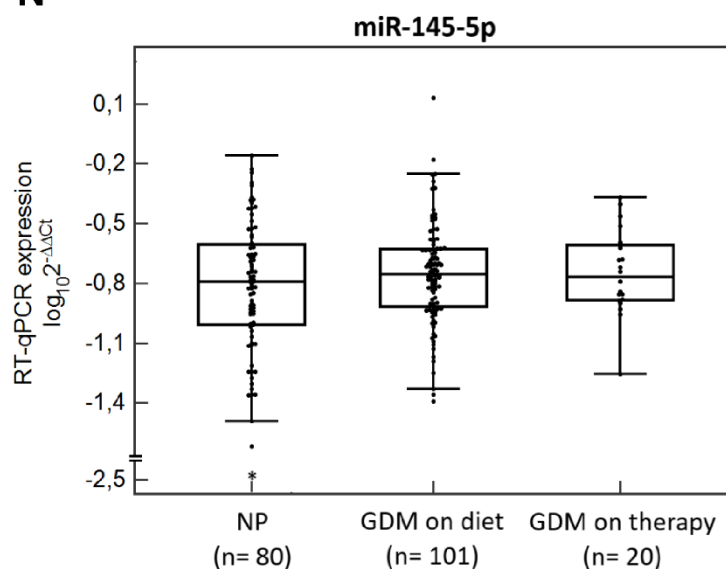**O**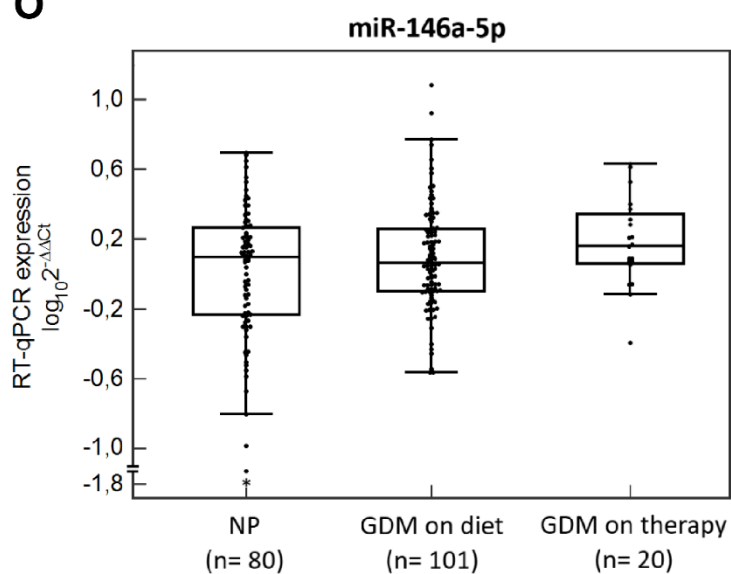**P**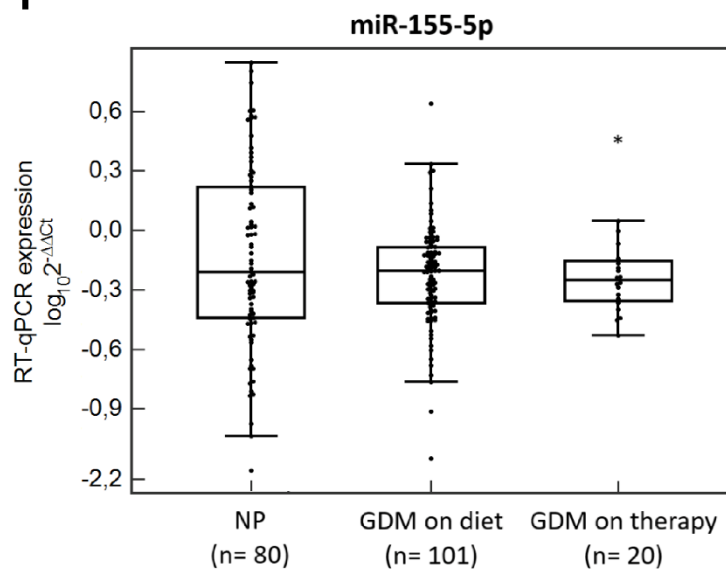**Q**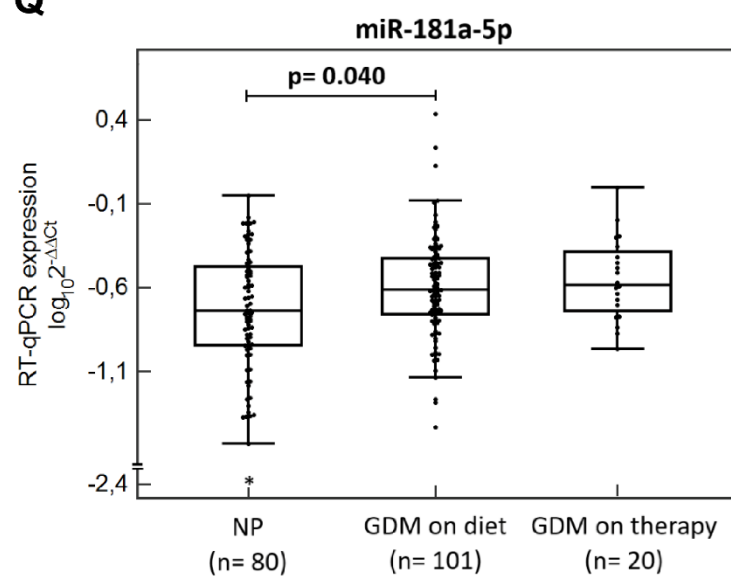**R**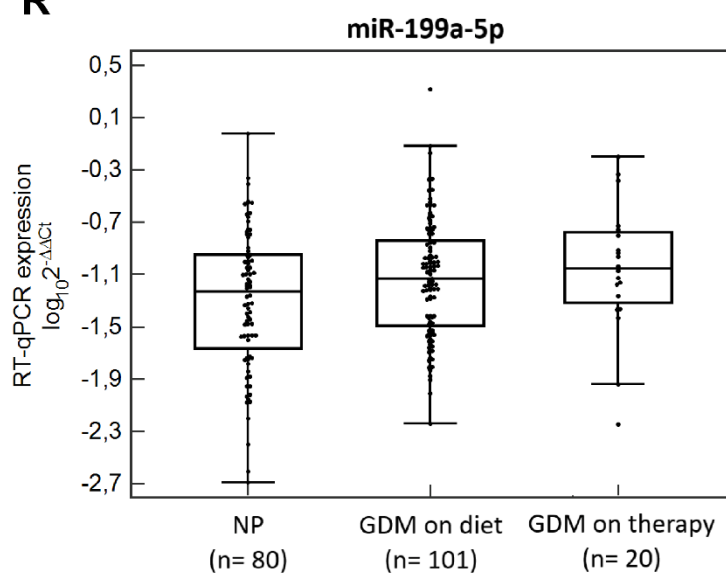

**S**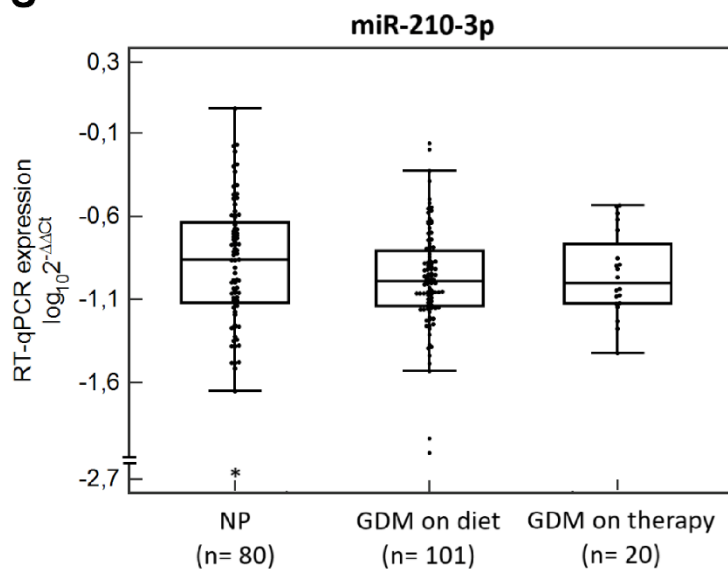**T**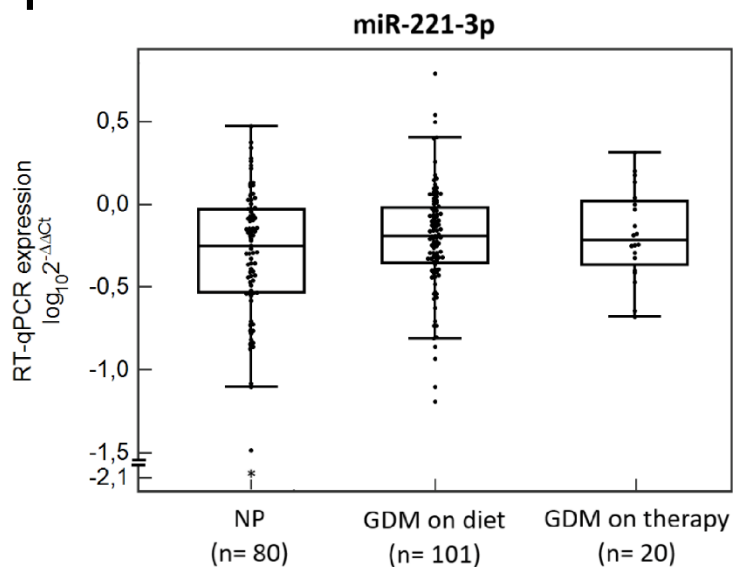**U**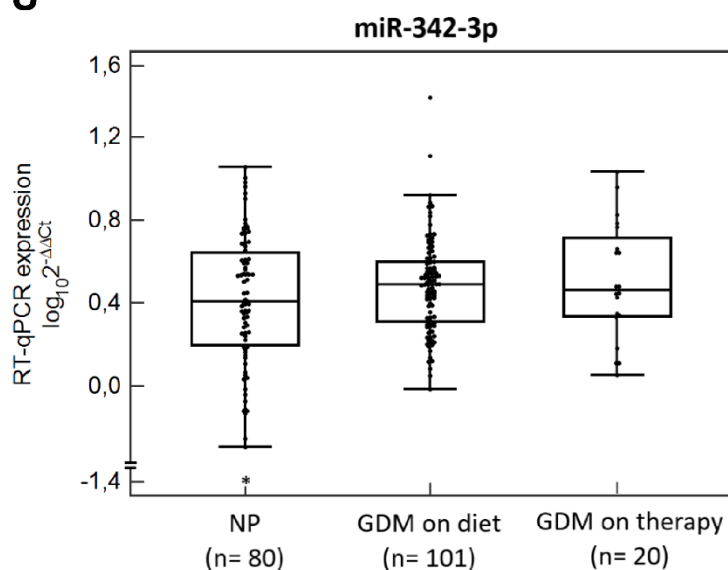**V**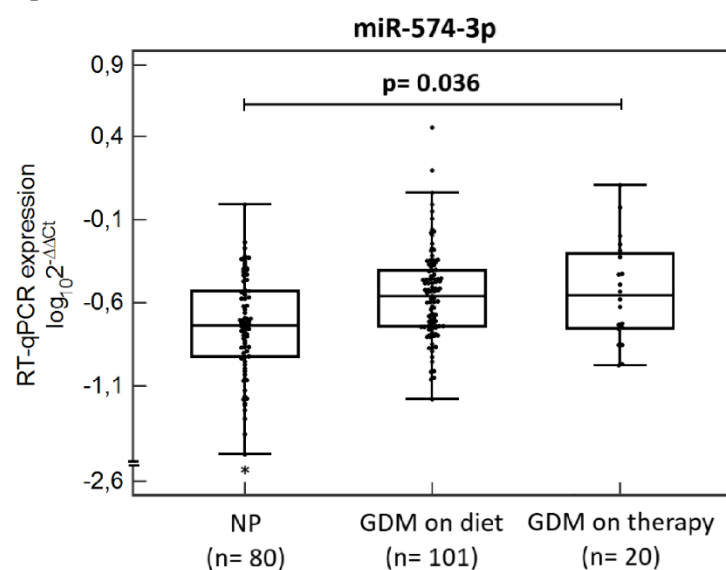

**Supplementary Figure S4.** Comparison of miRNAs gene expression in peripheral blood leukocytes in early stages of gestation between pregnancies with normal course and those with GDM with respect to the GDM treatment strategies (GDM pregnancies on diet only and GDM pregnancies requiring the combination of diet and administration of appropriate therapy) – non-significant results after the Benjamini-Hochberg correction (but with  $\alpha < 0.05$ ) and non-significant results ( $\alpha > 0.05$ ).
