# Supplementary material for: Cardiovascular Disease-Associated MicroRNAs as Novel Biomarkers of First-Trimester Screening for Gestational Diabetes Mellitus in the Absence of Other Pregnancy-Related Complications
Source: MDPI journal article supplement (doi:10.3390/ijms231810635), 2022-09-13
Supplement: s1 [file s1]

Supplementary Figure S1.

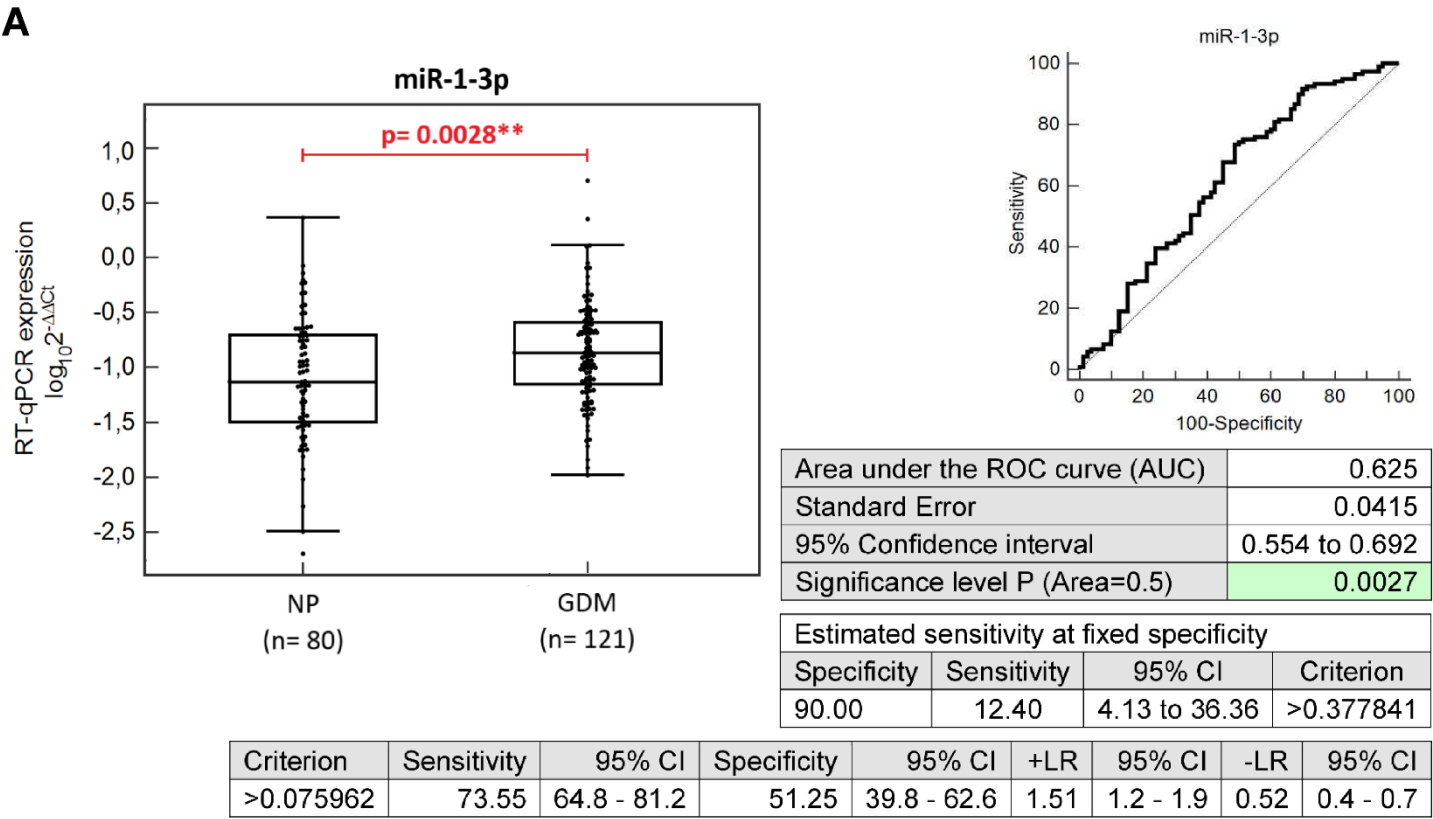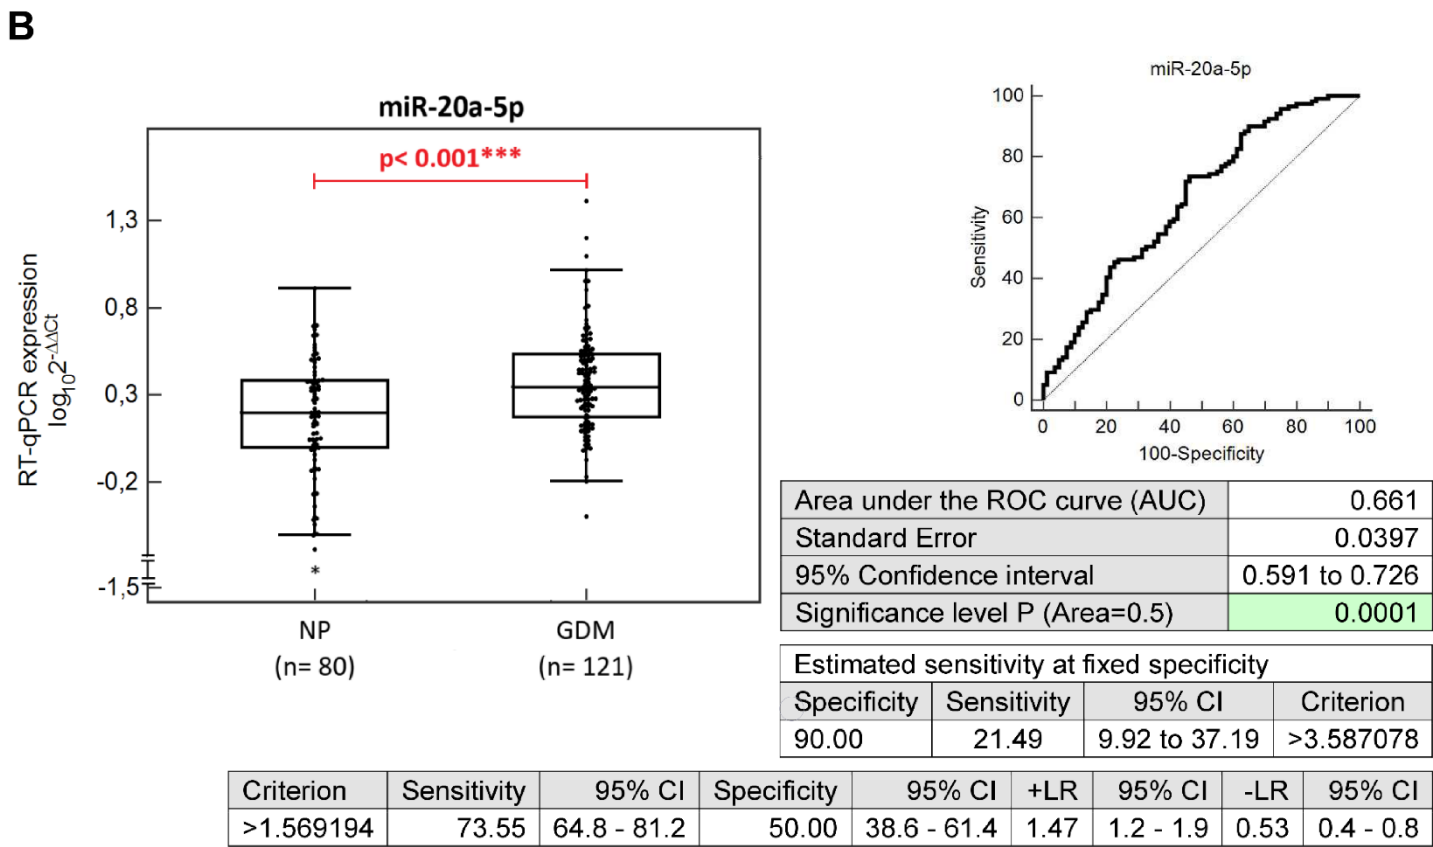

**C**

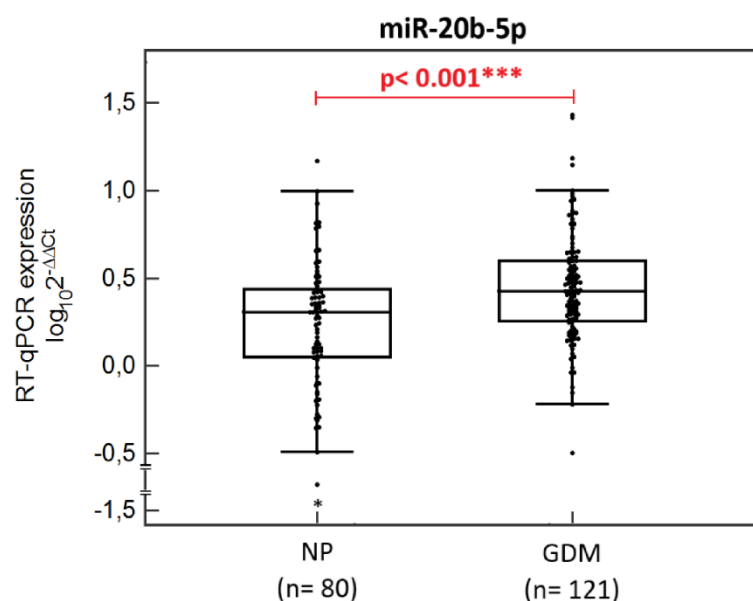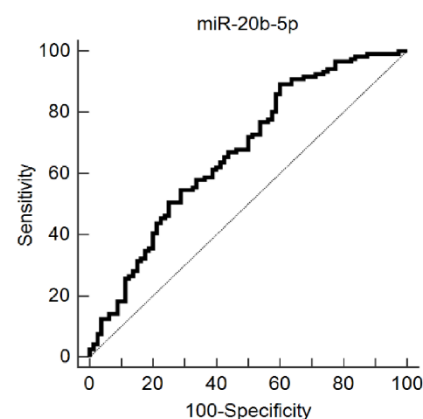

|                                 |                |
|---------------------------------|----------------|
| Area under the ROC curve (AUC)  | 0.670          |
| Standard Error                  | 0.0396         |
| 95% Confidence interval         | 0.600 to 0.734 |
| Significance level P (Area=0.5) | <0.0001        |

| Estimated sensitivity at fixed specificity |             |               |           |
|--------------------------------------------|-------------|---------------|-----------|
| Specificity                                | Sensitivity | 95% CI        | Criterion |
| 90.00                                      | 18.18       | 7.44 to 33.88 | >4.517659 |

| Criterion | Sensitivity | 95% CI      | Specificity | 95% CI      | +LR  | 95% CI    | -LR  | 95% CI    |
|-----------|-------------|-------------|-------------|-------------|------|-----------|------|-----------|
| >1.385992 | 89.26       | 82.3 - 94.2 | 40.00       | 29.2 - 51.6 | 1.49 | 1.2 - 1.8 | 0.27 | 0.2 - 0.5 |

**D**

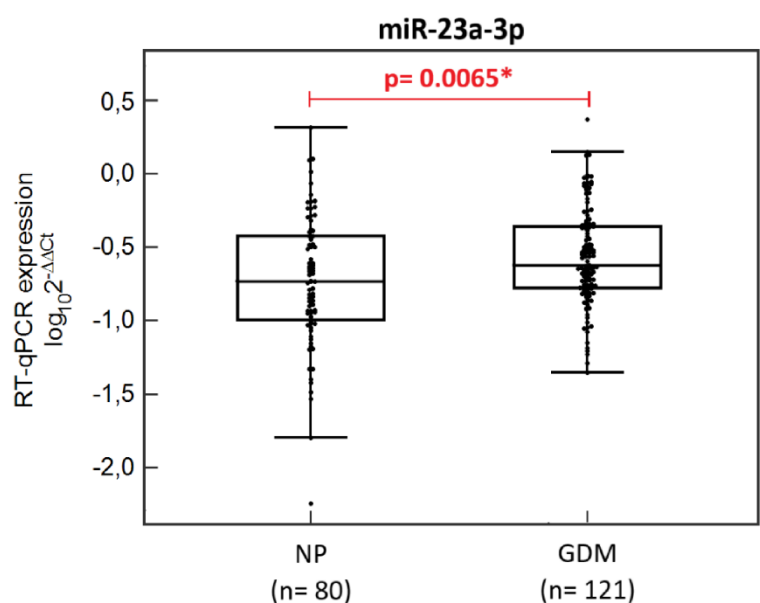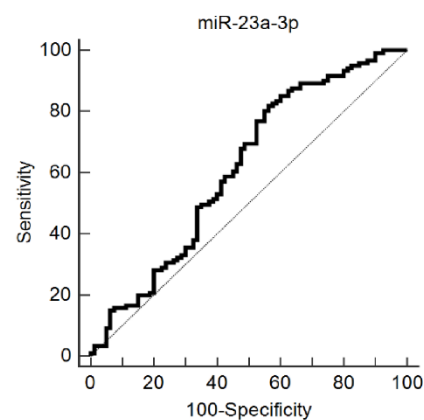

|                                 |                |
|---------------------------------|----------------|
| Area under the ROC curve (AUC)  | 0.613          |
| Standard Error                  | 0.0422         |
| 95% Confidence interval         | 0.542 to 0.681 |
| Significance level P (Area=0.5) | 0.0072         |

| Estimated sensitivity at fixed specificity |             |               |           |
|--------------------------------------------|-------------|---------------|-----------|
| Specificity                                | Sensitivity | 95% CI        | Criterion |
| 90.00                                      | 15.70       | 5.79 to 24.79 | >0.642408 |

| Criterion | Sensitivity | 95% CI      | Specificity | 95% CI      | +LR  | 95% CI    | -LR  | 95% CI    |
|-----------|-------------|-------------|-------------|-------------|------|-----------|------|-----------|
| >0.150403 | 81.82       | 73.8 - 88.2 | 43.75       | 32.7 - 55.3 | 1.45 | 1.2 - 1.8 | 0.42 | 0.3 - 0.7 |

**E**

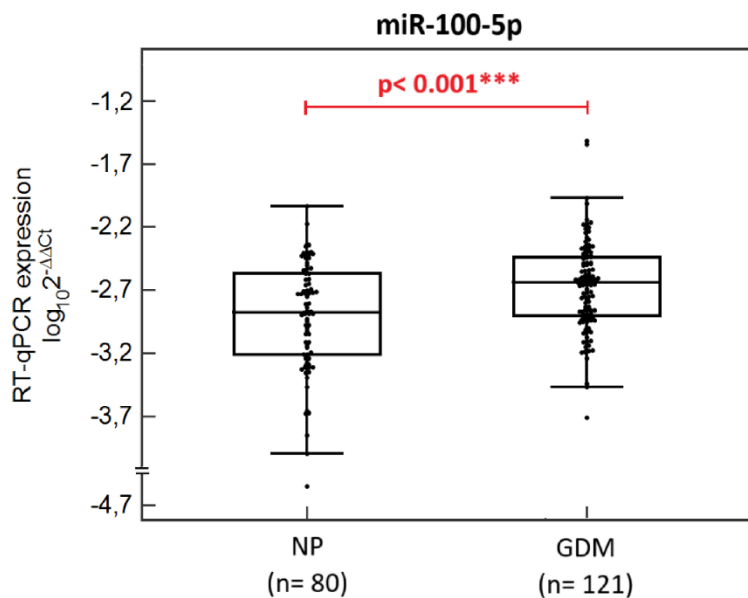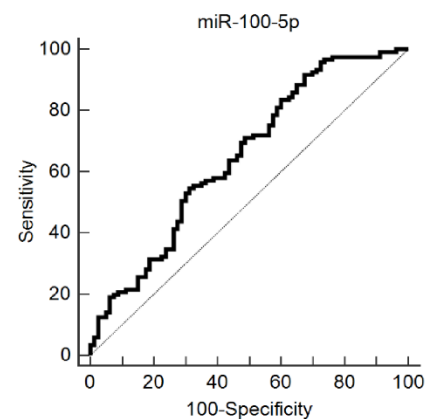

|                                 |                |
|---------------------------------|----------------|
| Area under the ROC curve (AUC)  | 0.649          |
| Standard Error                  | 0.0404         |
| 95% Confidence interval         | 0.579 to 0.715 |
| Significance level P (Area=0.5) | 0.0002         |

| Estimated sensitivity at fixed specificity |             |                |           |
|--------------------------------------------|-------------|----------------|-----------|
| Specificity                                | Sensitivity | 95% CI         | Criterion |
| 90.00                                      | 20.66       | 11.57 to 32.23 | >0.003876 |

| Criterion | Sensitivity | 95% CI      | Specificity | 95% CI      | +LR  | 95% CI    | -LR  | 95% CI    |
|-----------|-------------|-------------|-------------|-------------|------|-----------|------|-----------|
| >0.00077  | 91.74       | 85.3 - 96.0 | 32.50       | 22.4 - 43.9 | 1.36 | 1.2 - 1.6 | 0.25 | 0.1 - 0.5 |

**F**

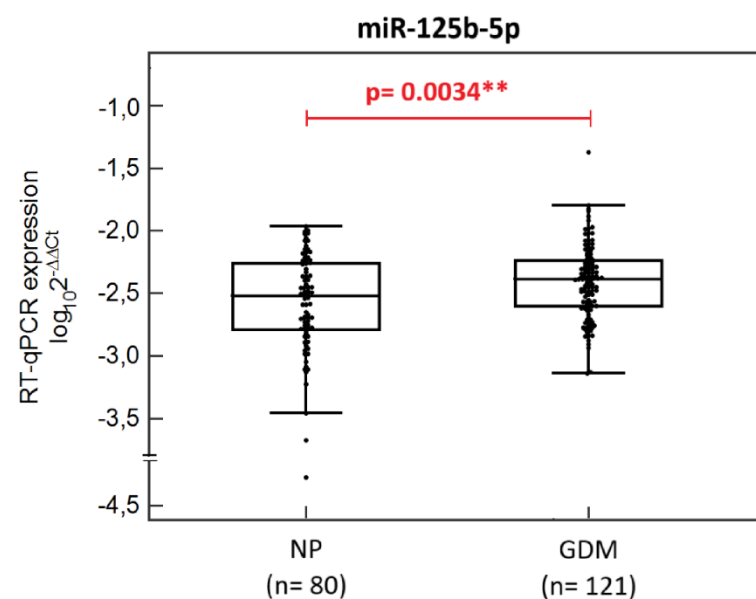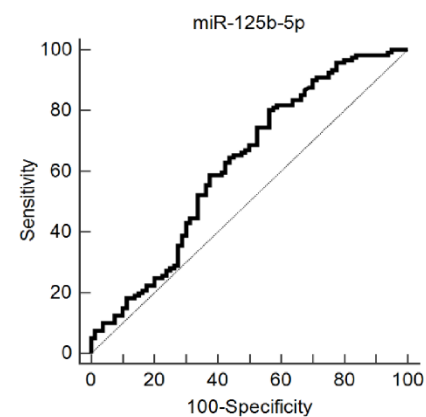

|                                 |                |
|---------------------------------|----------------|
| Area under the ROC curve (AUC)  | 0.622          |
| Standard Error                  | 0.0418         |
| 95% Confidence interval         | 0.551 to 0.689 |
| Significance level P (Area=0.5) | 0.0035         |

| Estimated sensitivity at fixed specificity |             |               |           |
|--------------------------------------------|-------------|---------------|-----------|
| Specificity                                | Sensitivity | 95% CI        | Criterion |
| 90.00                                      | 14.88       | 6.61 to 25.62 | >0.007436 |

| Criterion | Sensitivity | 95% CI      | Specificity | 95% CI      | +LR  | 95% CI    | -LR  | 95% CI    |
|-----------|-------------|-------------|-------------|-------------|------|-----------|------|-----------|
| >0.002223 | 80.17       | 71.9 - 86.9 | 43.75       | 32.7 - 55.3 | 1.43 | 1.2 - 1.8 | 0.45 | 0.3 - 0.7 |

**G**

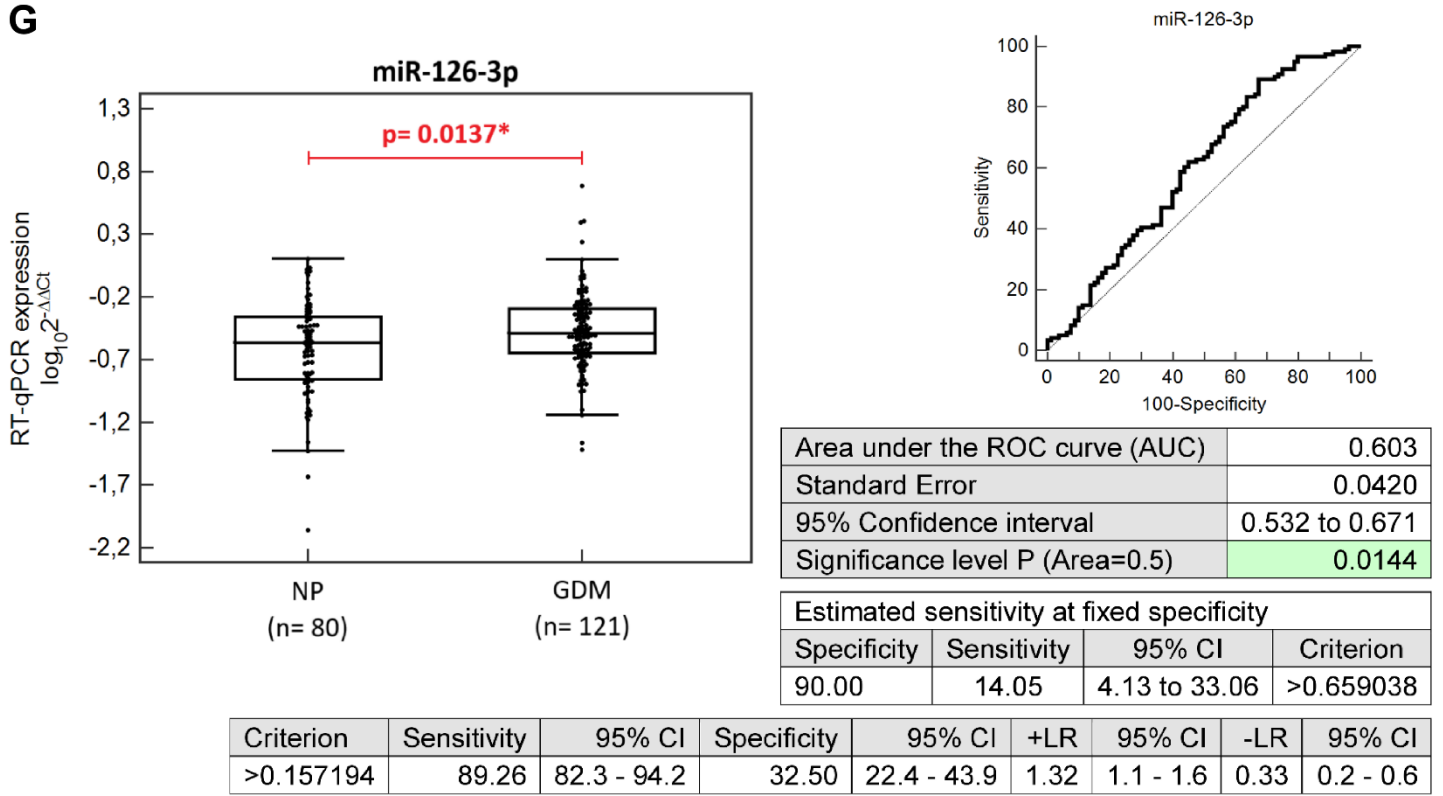

**H**

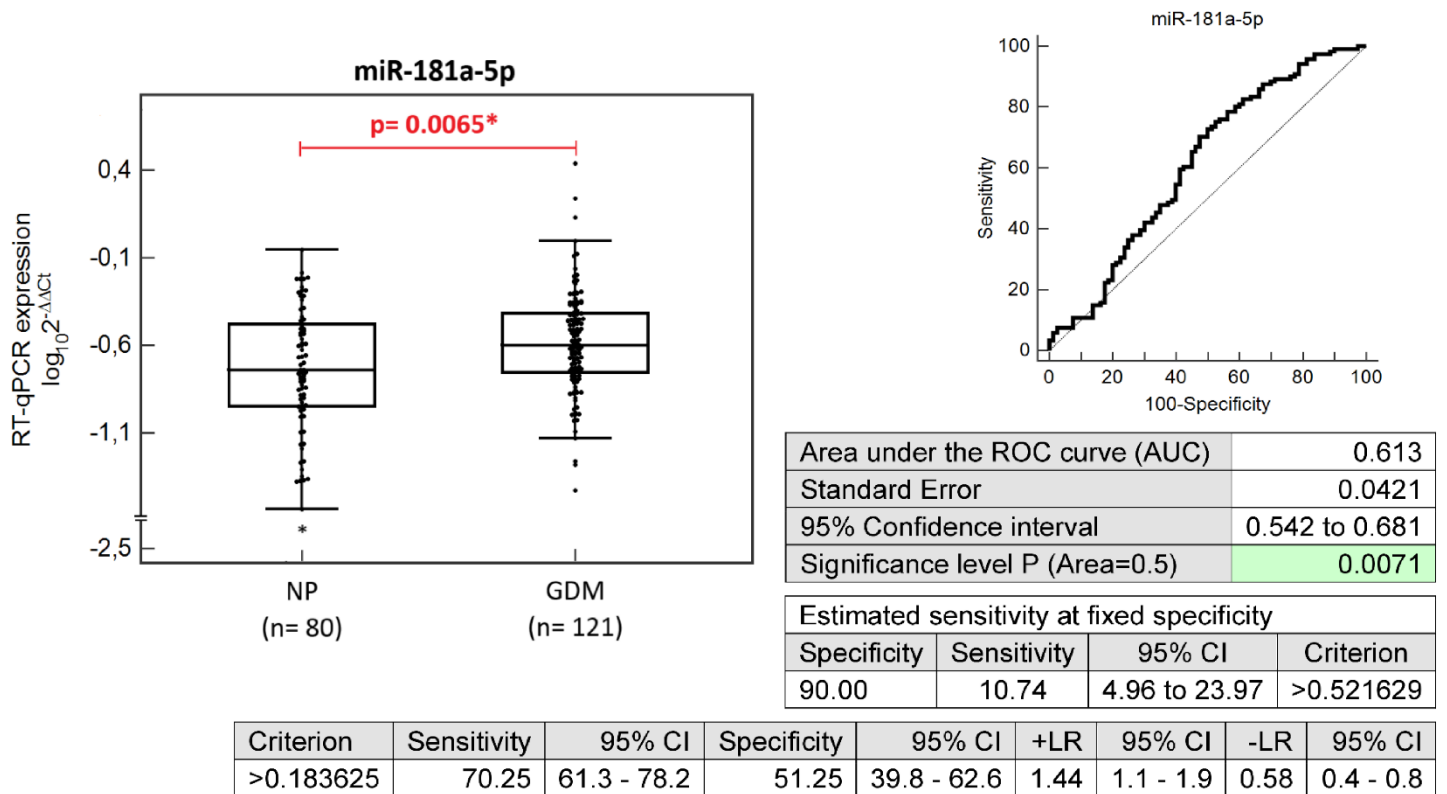

I

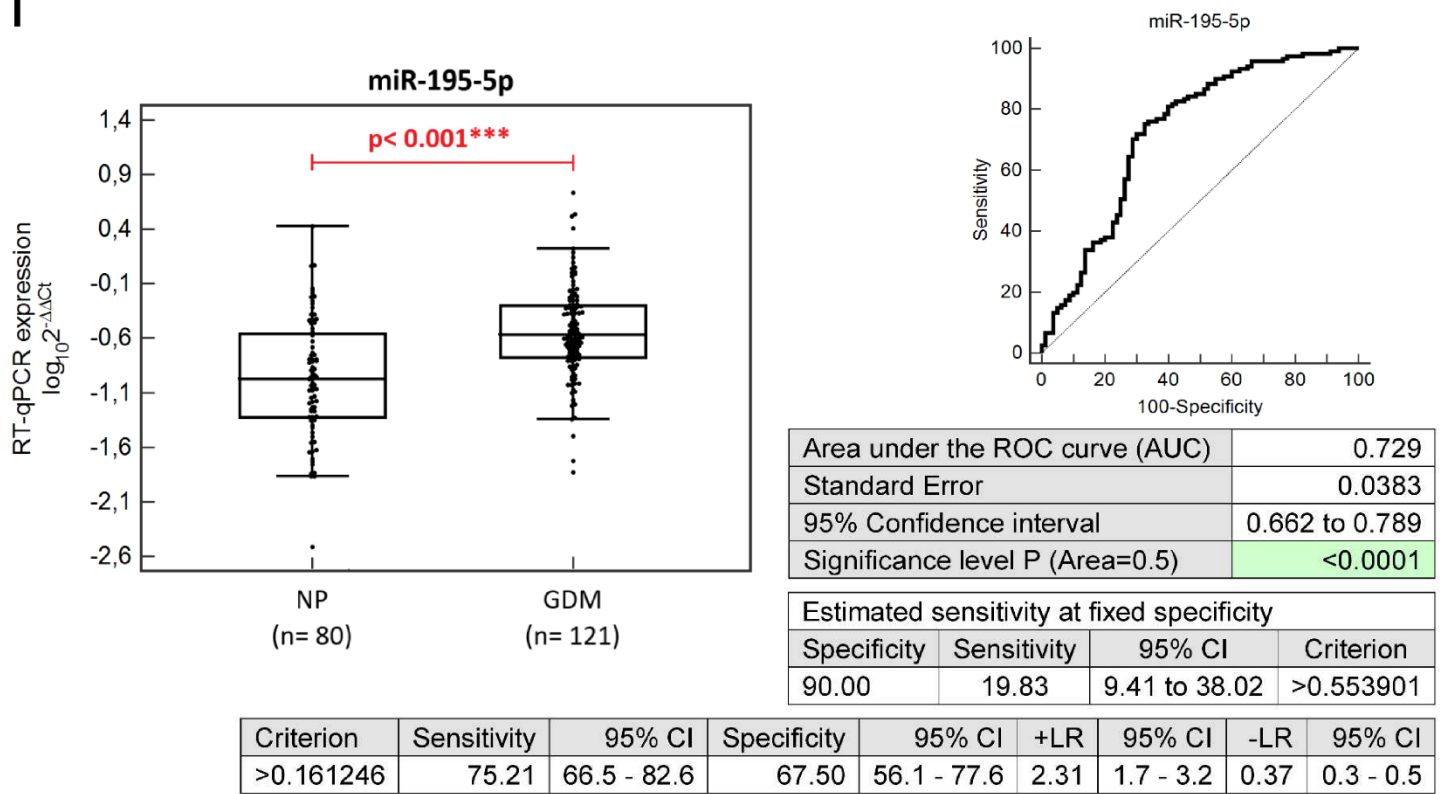

J

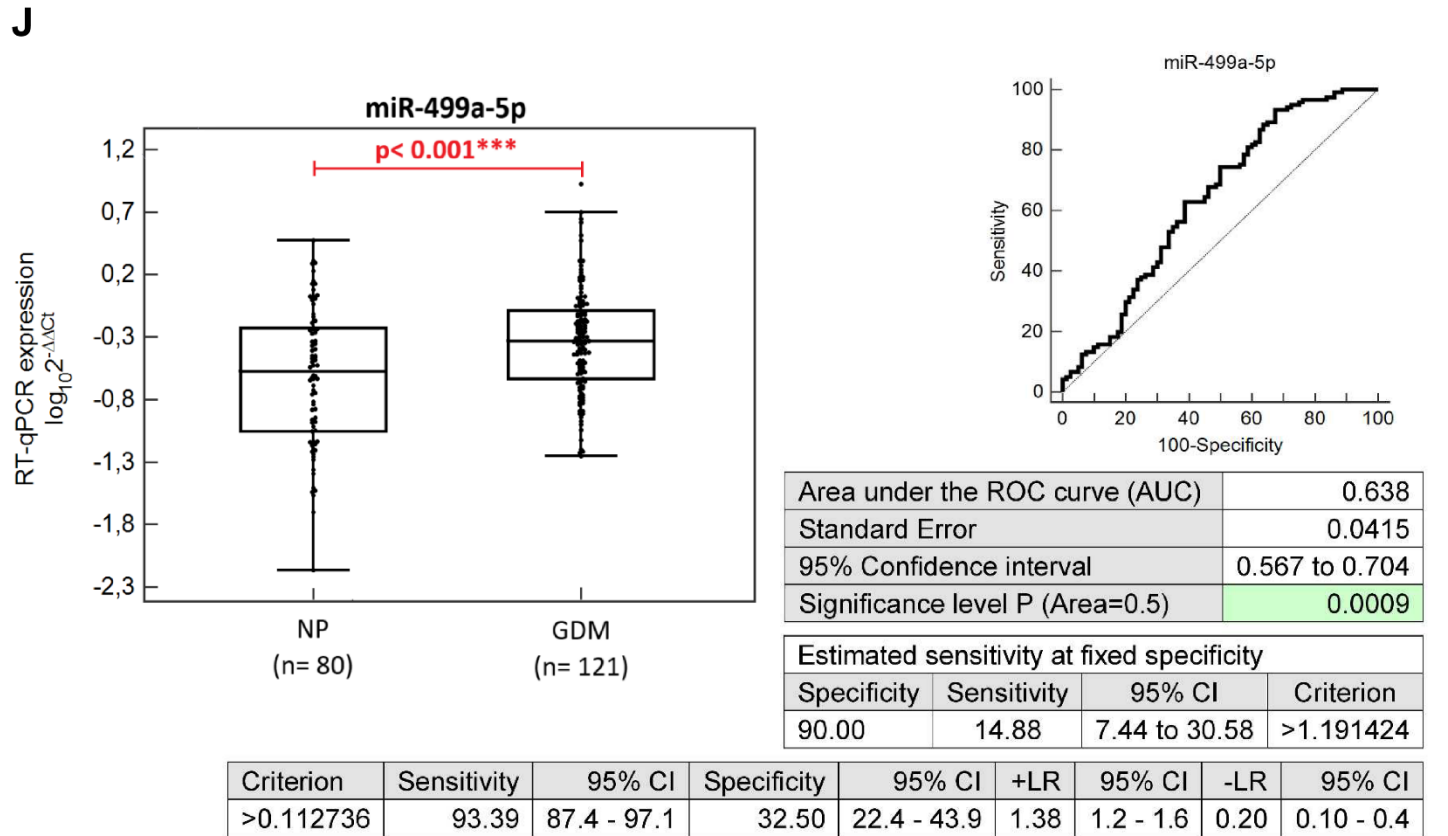

K

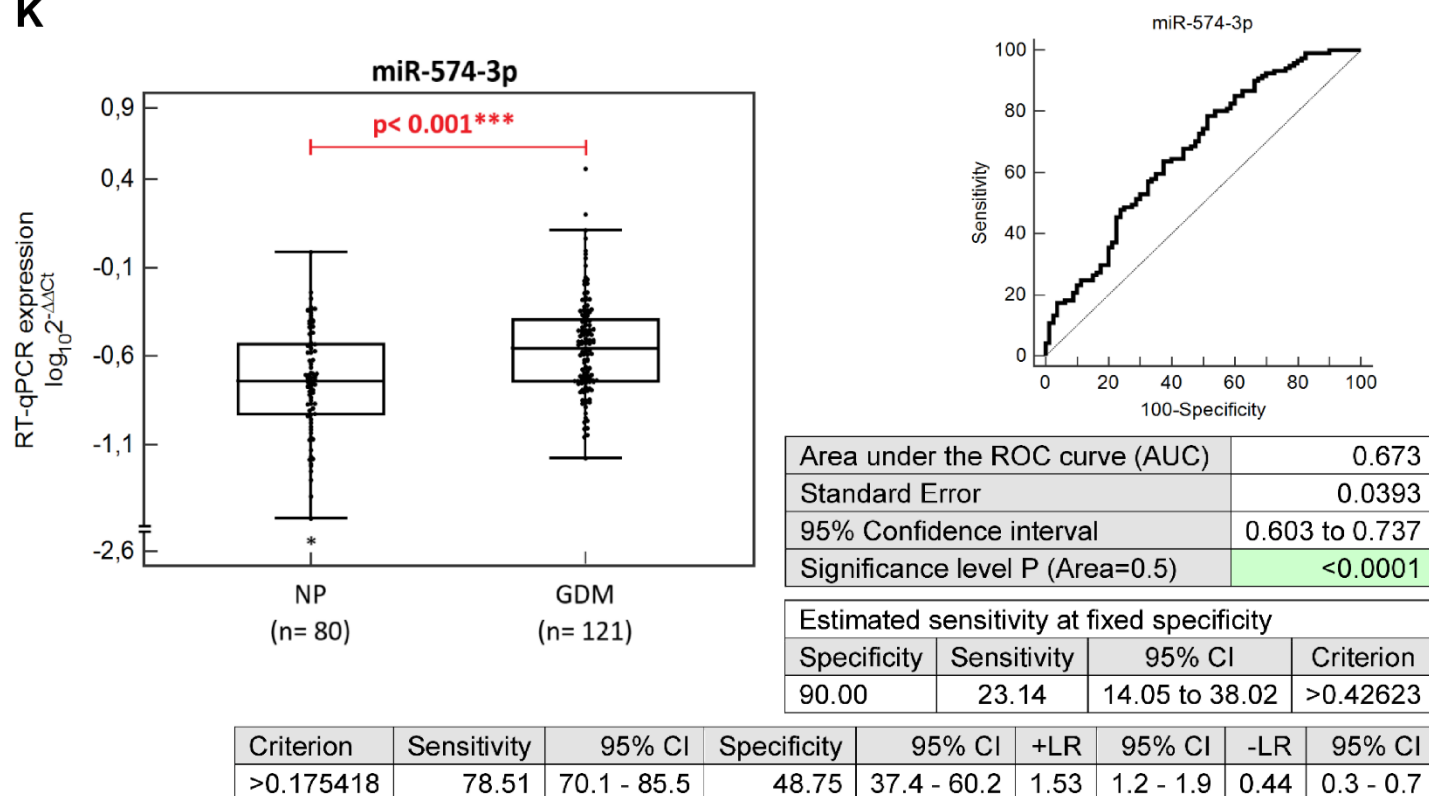

**Supplementary Figure S1.** Gene expression of miR-1-3p, miR-20a-5p, miR-20b-5p, miR-23a-3p, miR-100-5p, miR-125b-5p, miR-126-3p, miR-181a-5p, miR-195-5p, miR-499a-5p, and miR-574-3p in peripheral blood leukocytes in early stages of gestation (within 10 to 13 weeks) differentiates significantly (after the Benjamini-Hochberg correction) between pregnancies destined to develop GDM and term pregnancies with normal course of gestation.
