# Supplementary material for: Cardiovascular Disease-Associated MicroRNAs as Novel Biomarkers of First-Trimester Screening for Gestational Diabetes Mellitus in the Absence of Other Pregnancy-Related Complications
Source: MDPI journal article supplement (doi:10.3390/ijms231810635), 2022-09-13
Supplement: s1 [file s1]

Supplementary Figure S3.

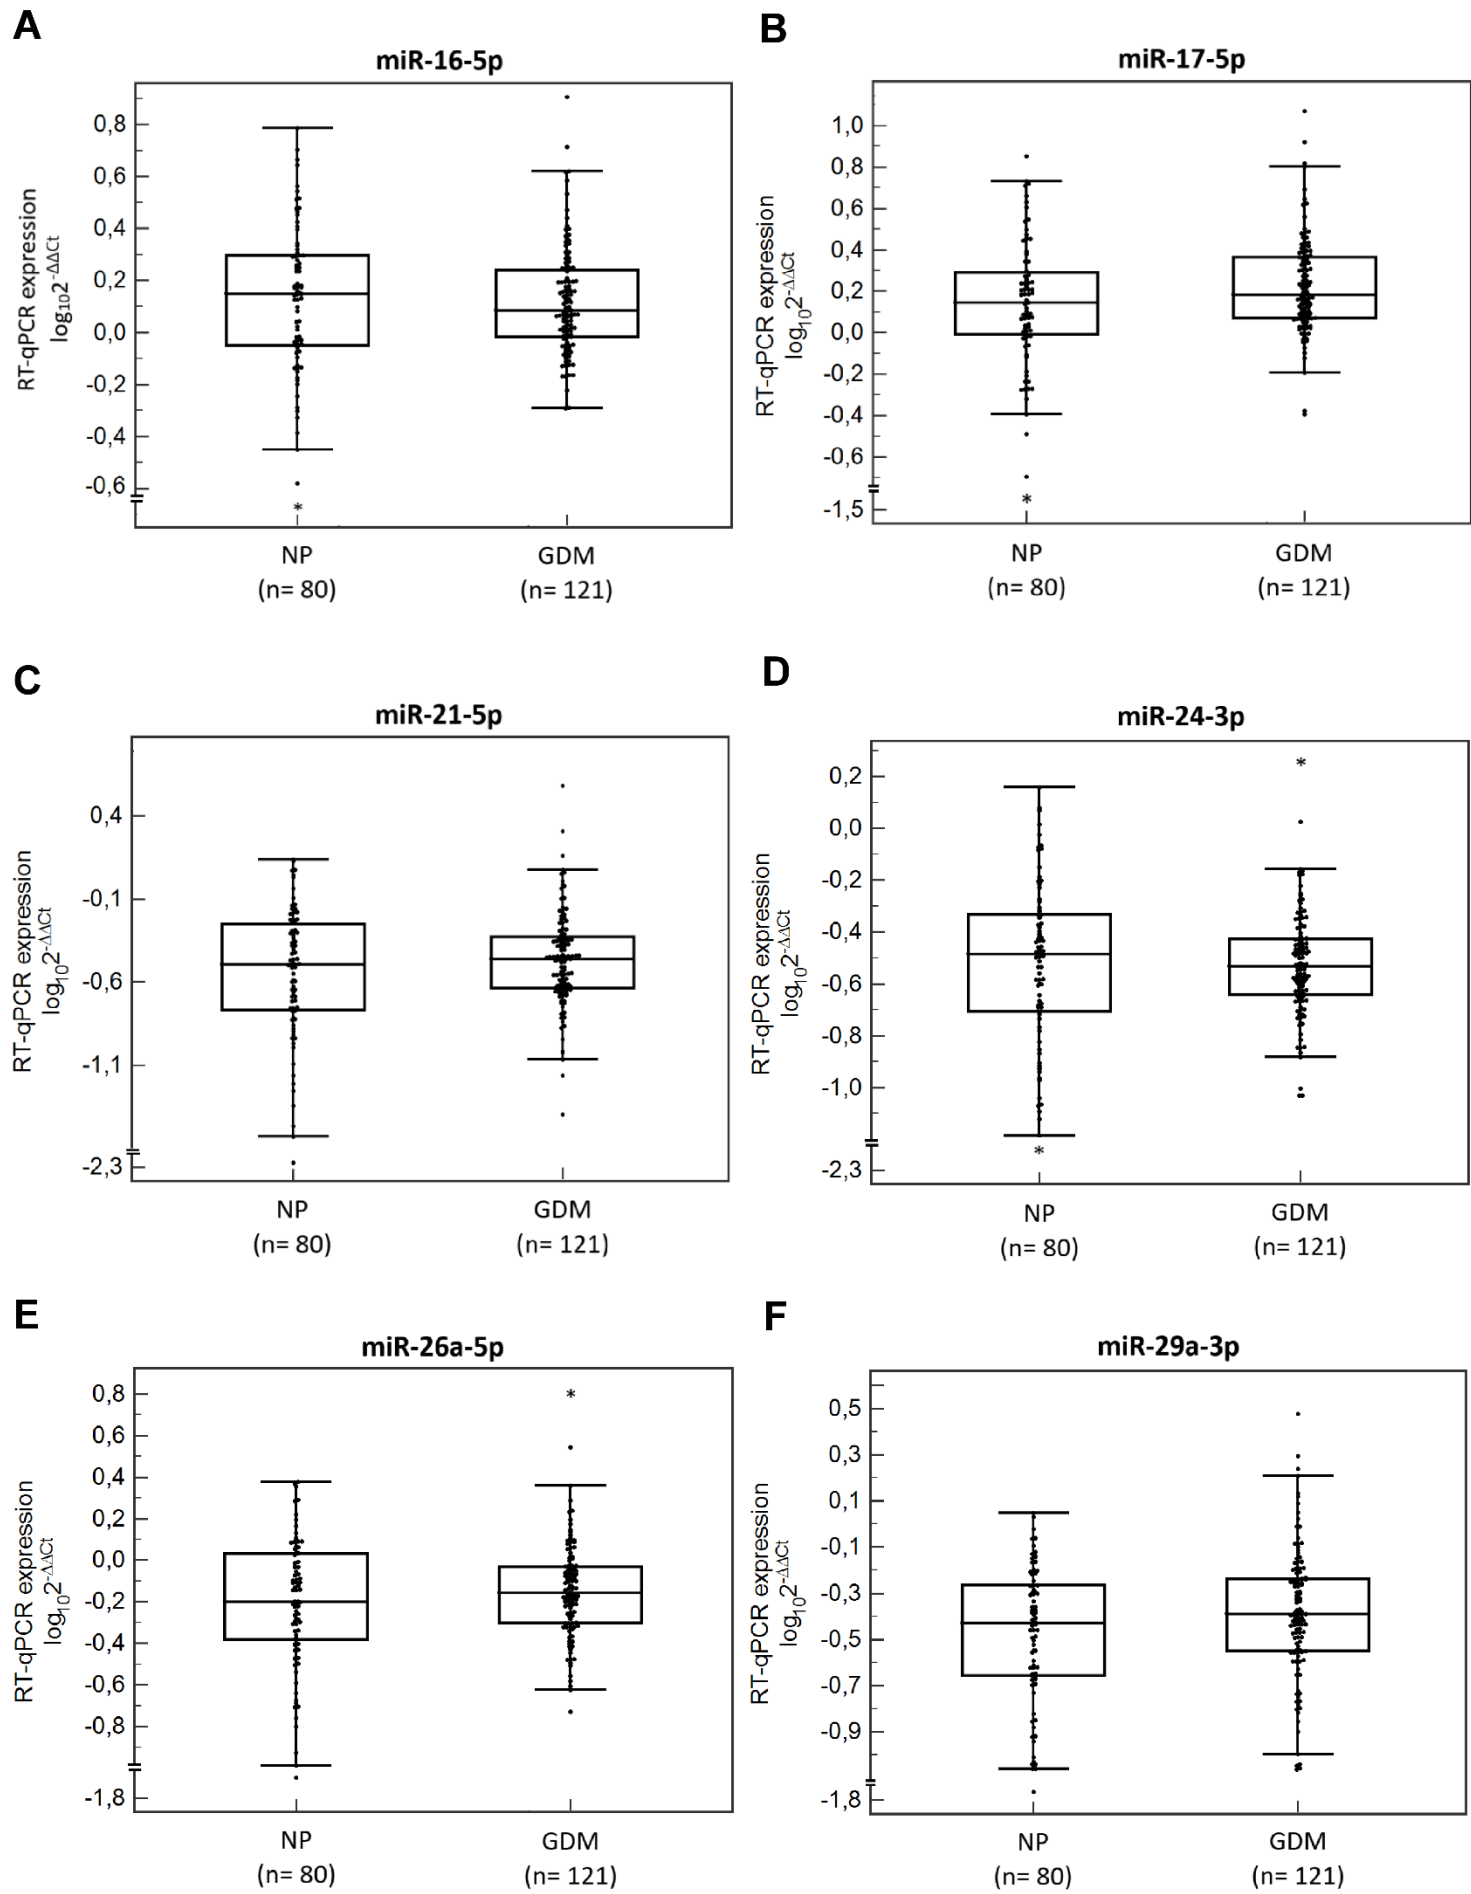

**G**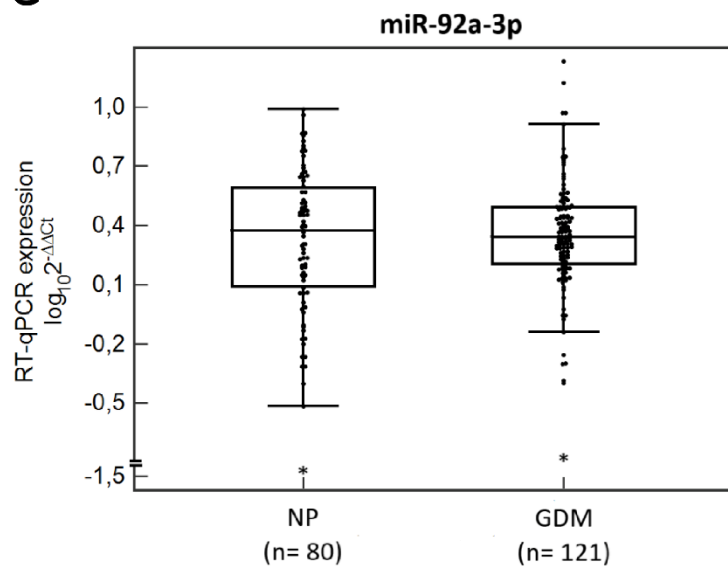**H**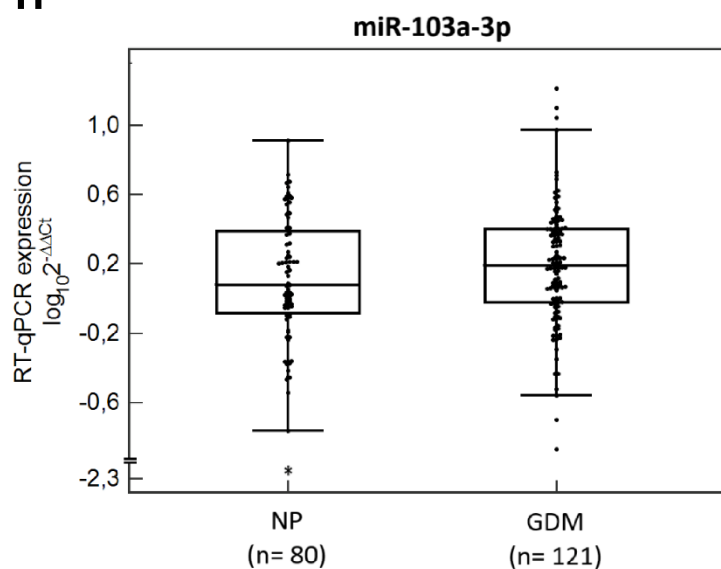**I**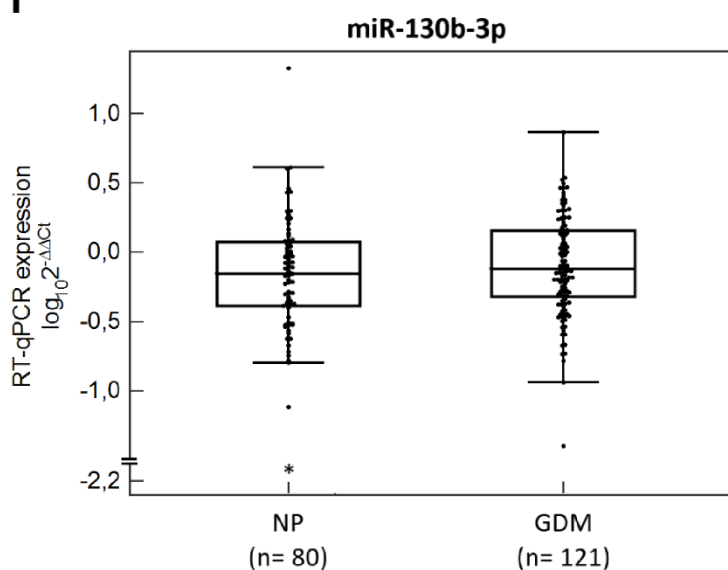**J**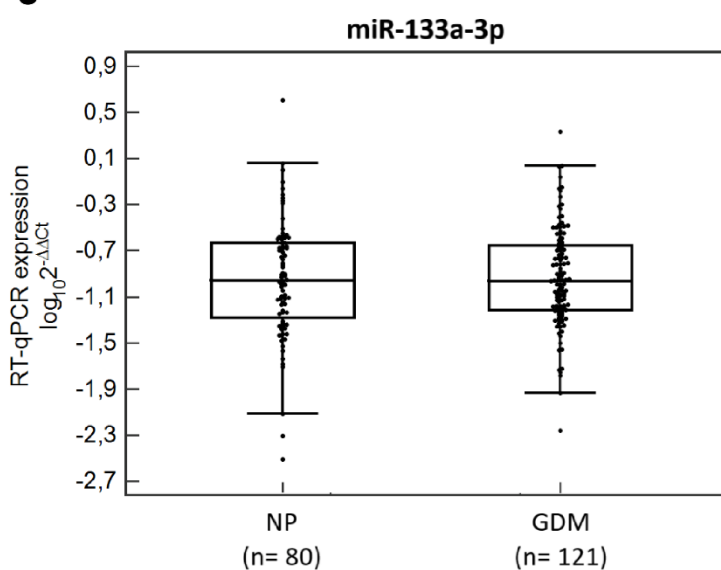**K**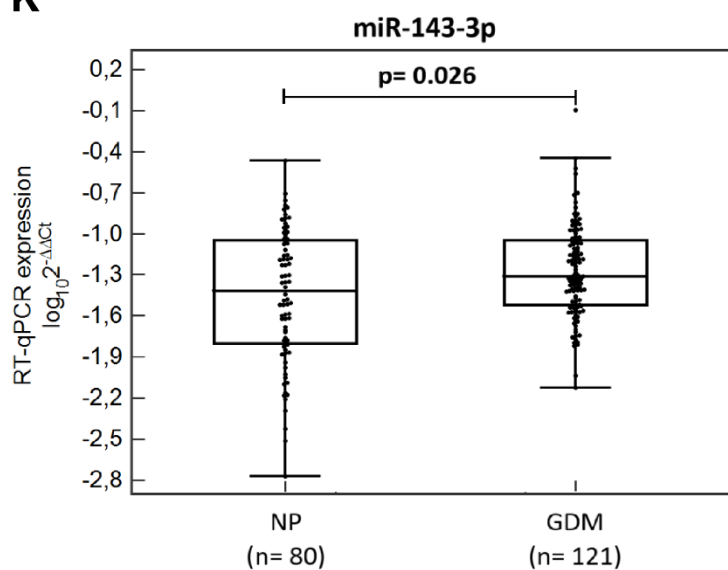**L**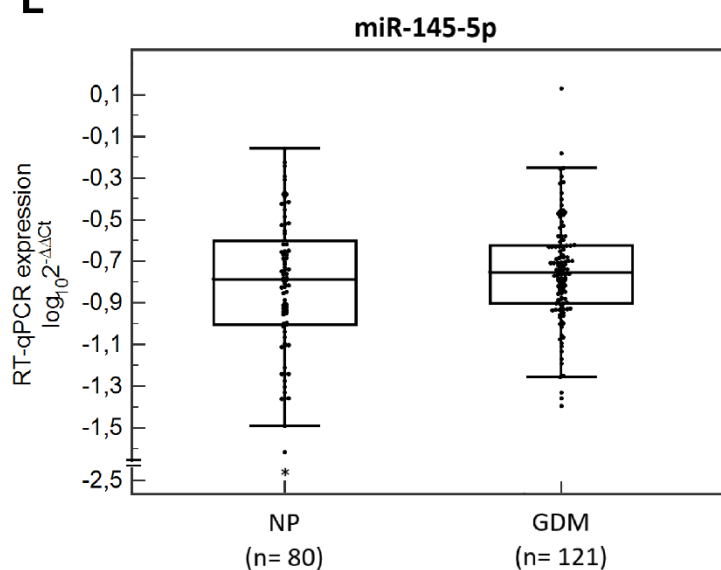

**M**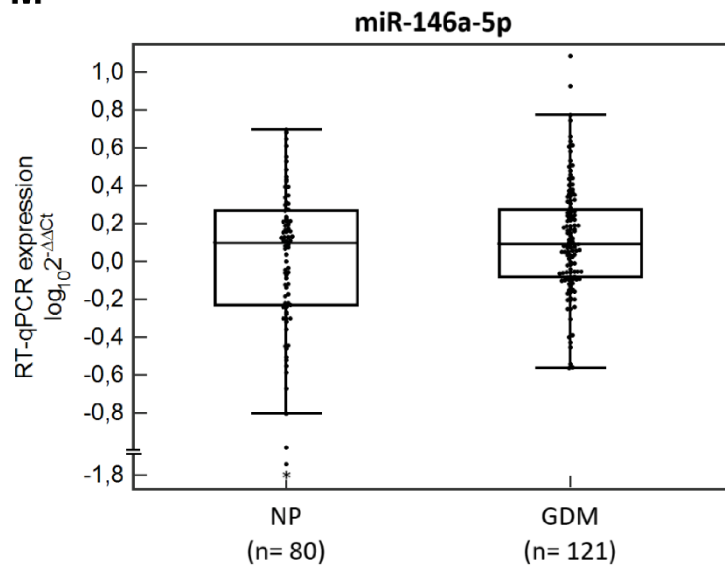**N**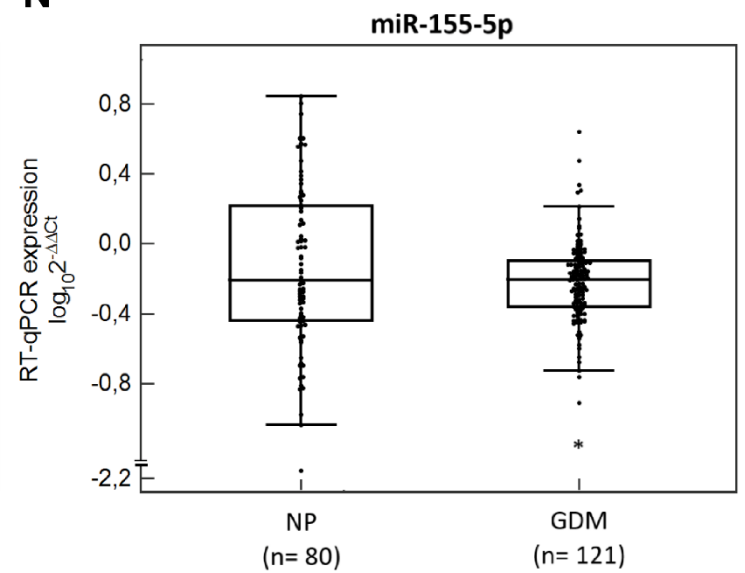**O**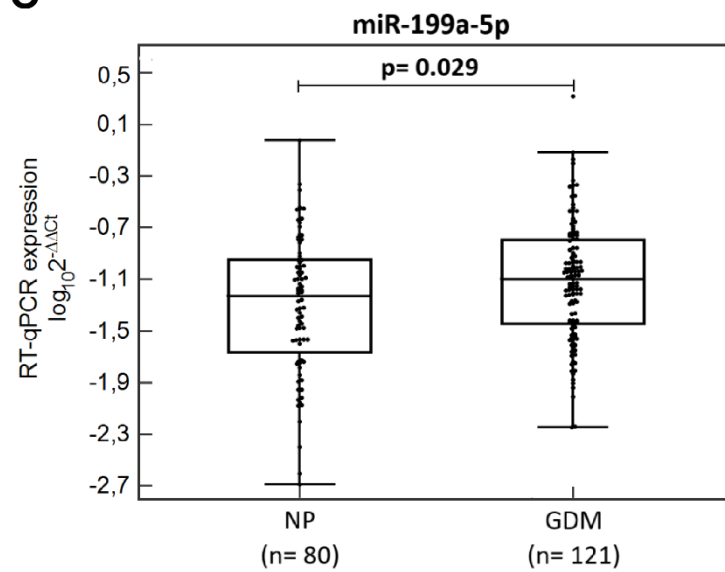**P**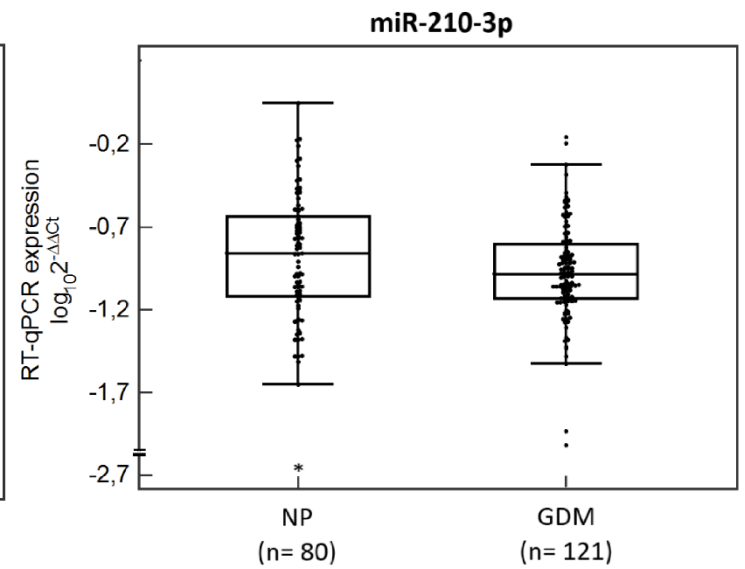**Q**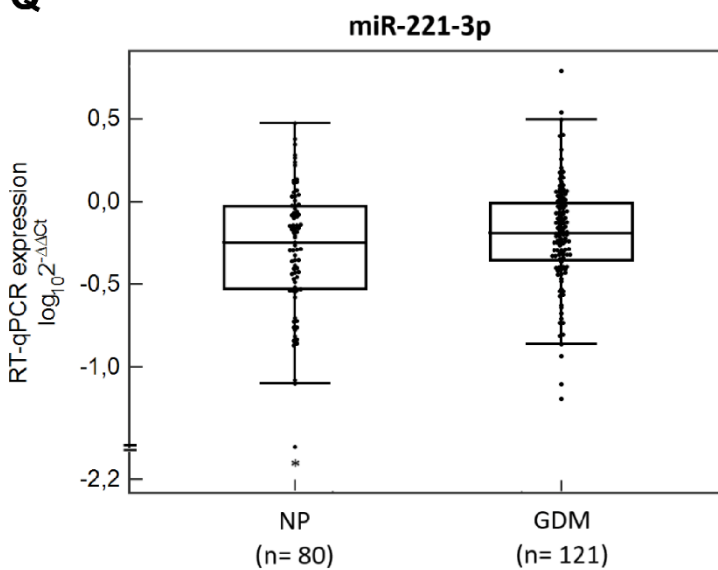**R**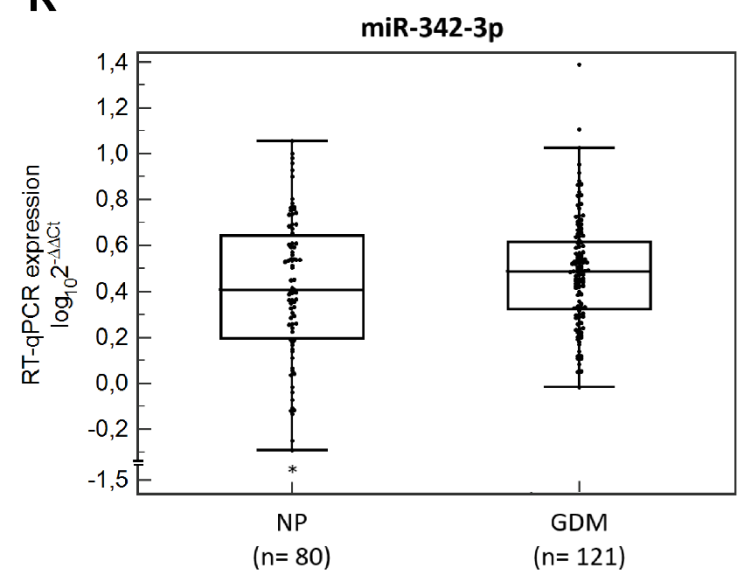

**Supplementary Figure S3.** Comparison of miRNAs gene expression in peripheral blood leukocytes in early stages of gestation between pregnancies with normal course and those with GDM – non-significant results after the Benjamini-Hochberg correction (but with  $\alpha < 0.05$ ) and non-significant results ( $\alpha > 0.05$ ).
