# Supplementary material for: Cardiovascular Disease-Associated MicroRNAs as Novel Biomarkers of First-Trimester Screening for Gestational Diabetes Mellitus in the Absence of Other Pregnancy-Related Complications
Source: MDPI journal article supplement (doi:10.3390/ijms231810635), 2022-09-13
Supplement: s1 [file s1]

Supplementary Figure S2.

A

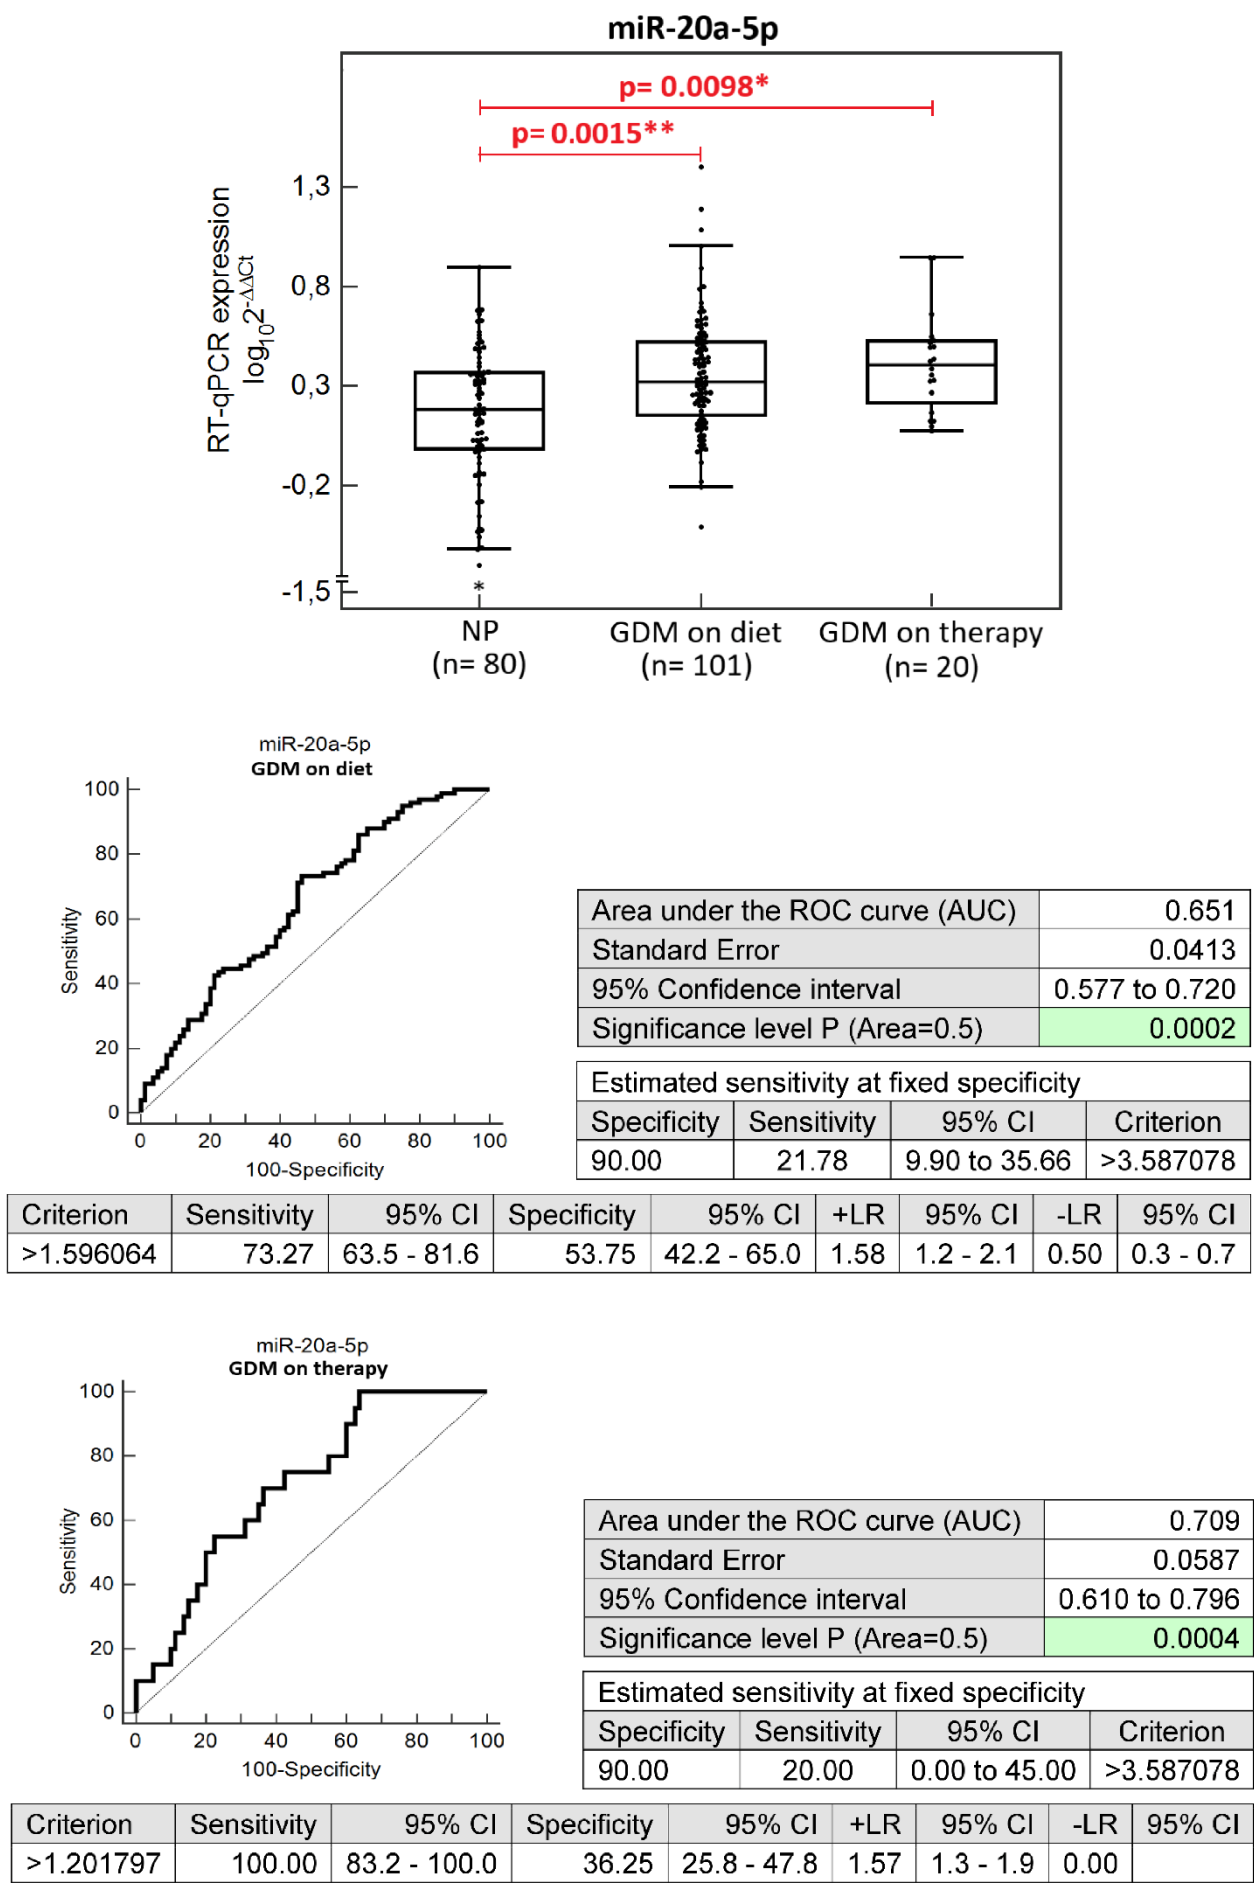

**B**

**miR-20b-5p**

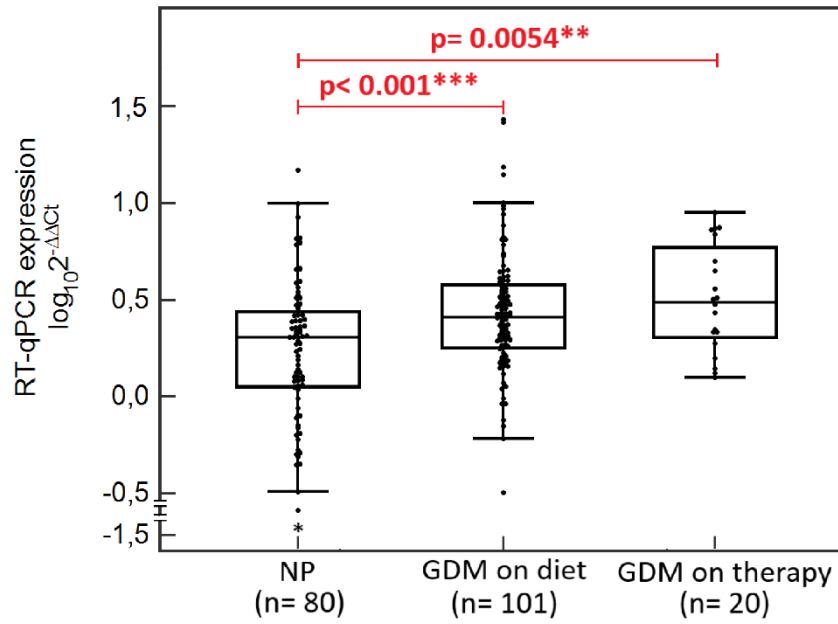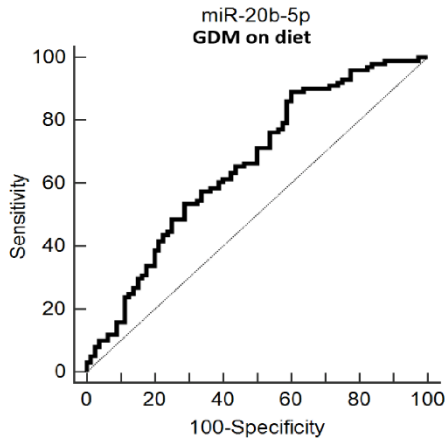

|                                 |                |
|---------------------------------|----------------|
| Area under the ROC curve (AUC)  | 0.659          |
| Standard Error                  | 0.0412         |
| 95% Confidence interval         | 0.585 to 0.728 |
| Significance level P (Area=0.5) | 0.0001         |

Estimated sensitivity at fixed specificity

| Specificity | Sensitivity | 95% CI        | Criterion |
|-------------|-------------|---------------|-----------|
| 90.00       | 15.84       | 5.94 to 33.66 | >4.517659 |

| Criterion | Sensitivity | 95% CI      | Specificity | 95% CI      | +LR  | 95% CI    | -LR  | 95% CI    |
|-----------|-------------|-------------|-------------|-------------|------|-----------|------|-----------|
| >1.385992 | 89.11       | 81.3 - 94.4 | 40.00       | 29.2 - 51.6 | 1.49 | 1.2 - 1.8 | 0.27 | 0.1 - 0.5 |

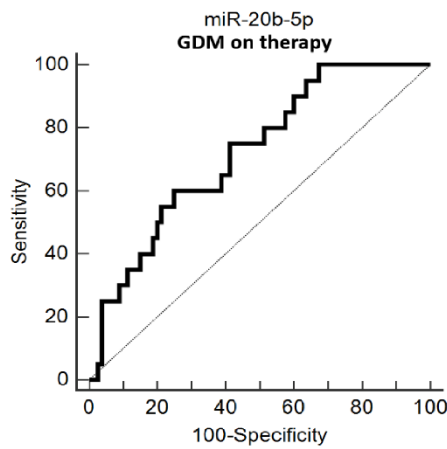

|                                 |                |
|---------------------------------|----------------|
| Area under the ROC curve (AUC)  | 0.721          |
| Standard Error                  | 0.0596         |
| 95% Confidence interval         | 0.622 to 0.806 |
| Significance level P (Area=0.5) | 0.0002         |

Estimated sensitivity at fixed specificity

| Specificity | Sensitivity | 95% CI         | Criterion |
|-------------|-------------|----------------|-----------|
| 90.00       | 30.00       | 10.00 to 55.00 | >4.517659 |

| Criterion | Sensitivity | 95% CI      | Specificity | 95% CI      | +LR  | 95% CI    | -LR  | 95% CI    |
|-----------|-------------|-------------|-------------|-------------|------|-----------|------|-----------|
| >2.64699  | 60.00       | 36.1 - 80.9 | 75.00       | 64.1 - 84.0 | 2.40 | 1.4 - 4.0 | 0.53 | 0.3 - 0.9 |

C

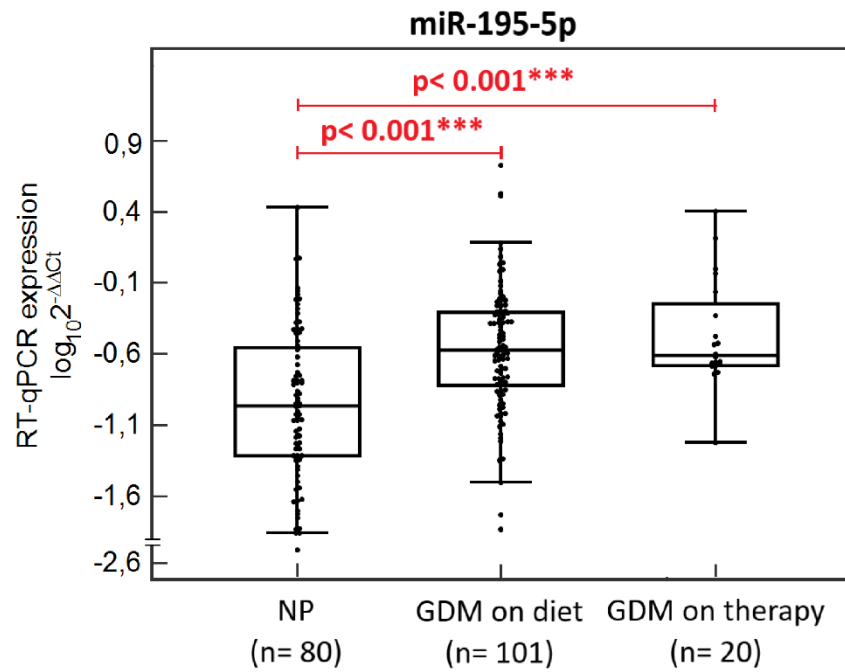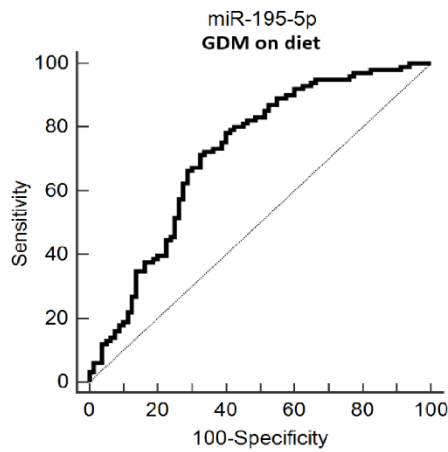

|                                 |                |
|---------------------------------|----------------|
| Area under the ROC curve (AUC)  | 0.720          |
| Standard Error                  | 0.0394         |
| 95% Confidence interval         | 0.648 to 0.784 |
| Significance level P (Area=0.5) | <0.0001        |

| Estimated sensitivity at fixed specificity |             |               |           |
|--------------------------------------------|-------------|---------------|-----------|
| Specificity                                | Sensitivity | 95% CI        | Criterion |
| 90.00                                      | 18.81       | 7.92 to 39.60 | >0.553901 |

| Criterion | Sensitivity | 95% CI      | Specificity | 95% CI      | +LR  | 95% CI    | -LR  | 95% CI    |
|-----------|-------------|-------------|-------------|-------------|------|-----------|------|-----------|
| >0.161246 | 71.29       | 61.4 - 79.9 | 67.50       | 56.1 - 77.6 | 2.19 | 1.6 - 3.1 | 0.43 | 0.3 - 0.6 |

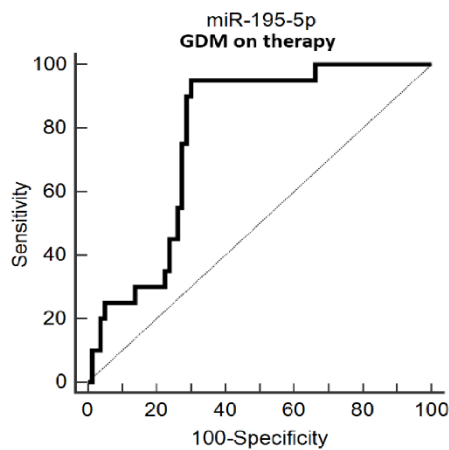

|                                 |                |
|---------------------------------|----------------|
| Area under the ROC curve (AUC)  | 0.778          |
| Standard Error                  | 0.0488         |
| 95% Confidence interval         | 0.684 to 0.855 |
| Significance level P (Area=0.5) | <0.0001        |

| Estimated sensitivity at fixed specificity |             |                |           |
|--------------------------------------------|-------------|----------------|-----------|
| Specificity                                | Sensitivity | 95% CI         | Criterion |
| 90.00                                      | 25.00       | 10.00 to 45.00 | >0.553901 |

| Criterion | Sensitivity | 95% CI      | Specificity | 95% CI      | +LR  | 95% CI    | -LR   | 95% CI     |
|-----------|-------------|-------------|-------------|-------------|------|-----------|-------|------------|
| >0.176527 | 95.00       | 75.1 - 99.9 | 70.00       | 58.7 - 79.7 | 3.17 | 2.2 - 4.5 | 0.071 | 0.01 - 0.5 |

**D**

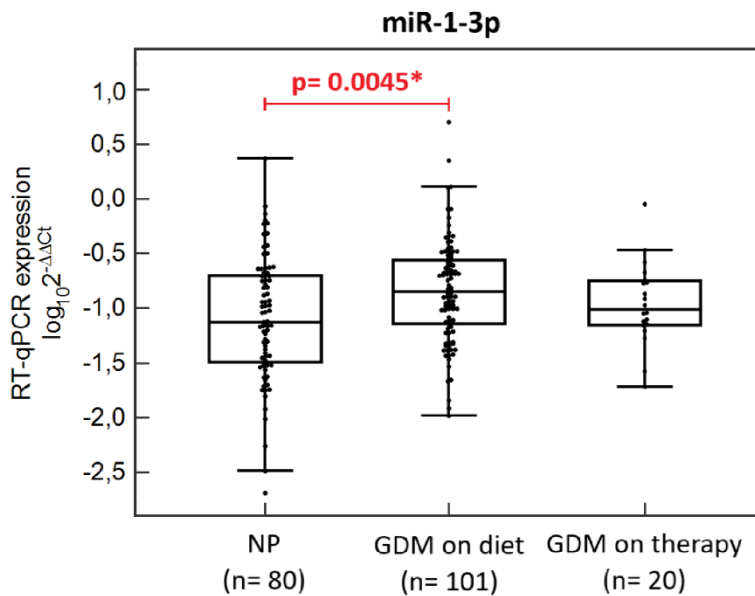

|                                 |                |
|---------------------------------|----------------|
| Area under the ROC curve (AUC)  | 0.635          |
| Standard Error                  | 0.0422         |
| 95% Confidence interval         | 0.560 to 0.705 |
| Significance level P (Area=0.5) | 0.0014         |

| Estimated sensitivity at fixed specificity |             |               |           |
|--------------------------------------------|-------------|---------------|-----------|
| Specificity                                | Sensitivity | 95% CI        | Criterion |
| 90.00                                      | 13.86       | 4.95 to 36.63 | >0.377841 |

| Criterion | Sensitivity | 95% CI      | Specificity | 95% CI      | +LR  | 95% CI    | -LR  | 95% CI    |
|-----------|-------------|-------------|-------------|-------------|------|-----------|------|-----------|
| >0.094818 | 71.29       | 61.4 - 79.9 | 55.00       | 43.5 - 66.2 | 1.58 | 1.2 - 2.1 | 0.52 | 0.4 - 0.8 |

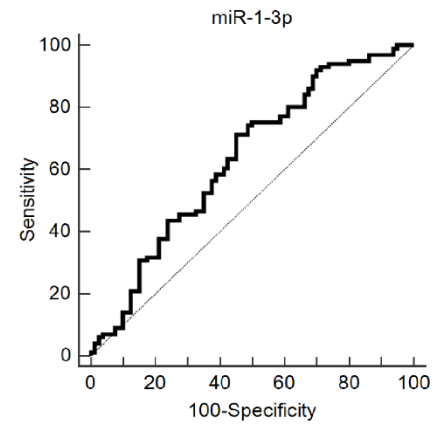

**E**

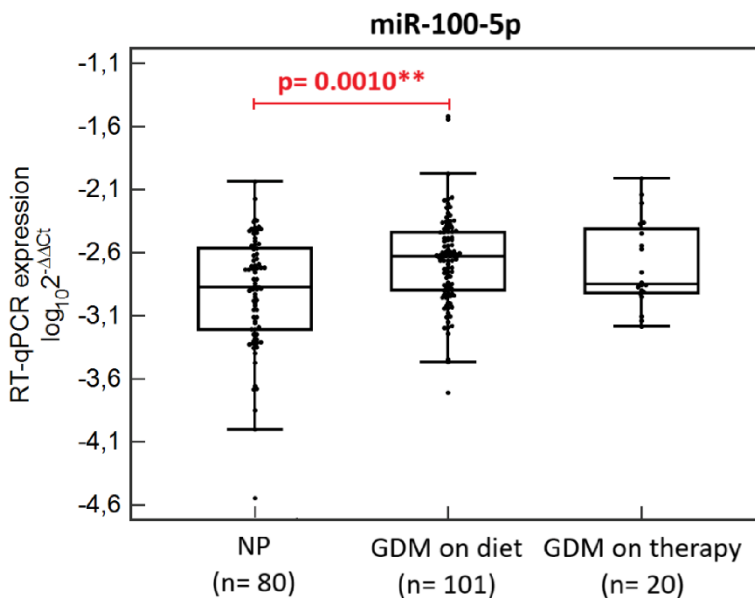

|                                 |                |
|---------------------------------|----------------|
| Area under the ROC curve (AUC)  | 0.654          |
| Standard Error                  | 0.0415         |
| 95% Confidence interval         | 0.580 to 0.723 |
| Significance level P (Area=0.5) | 0.0002         |

| Estimated sensitivity at fixed specificity |             |                |           |
|--------------------------------------------|-------------|----------------|-----------|
| Specificity                                | Sensitivity | 95% CI         | Criterion |
| 90.00                                      | 19.80       | 10.89 to 30.69 | >0.003876 |

| Criterion | Sensitivity | 95% CI      | Specificity | 95% CI      | +LR  | 95% CI    | -LR  | 95% CI    |
|-----------|-------------|-------------|-------------|-------------|------|-----------|------|-----------|
| >0.00203  | 57.43       | 47.2 - 67.2 | 68.75       | 57.4 - 78.7 | 1.84 | 1.3 - 2.6 | 0.62 | 0.5 - 0.8 |

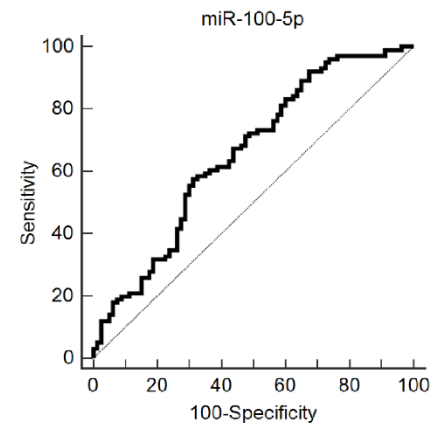

**F**

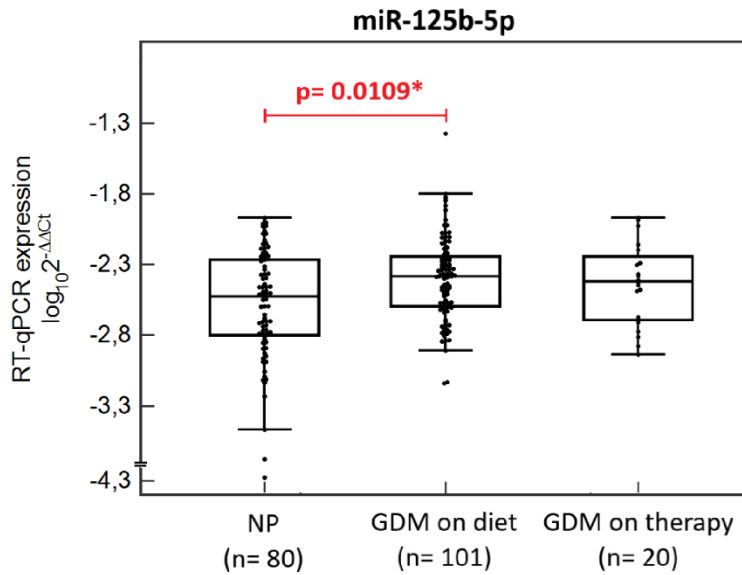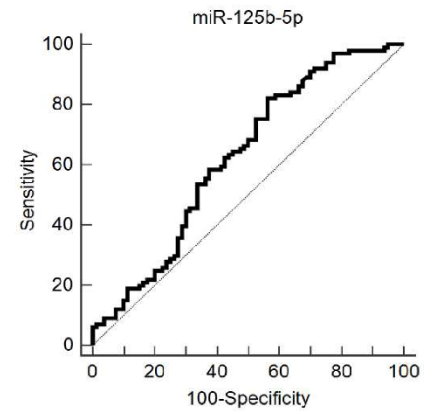

|                                 |                |
|---------------------------------|----------------|
| Area under the ROC curve (AUC)  | 0.625          |
| Standard Error                  | 0.0429         |
| 95% Confidence interval         | 0.550 to 0.695 |
| Significance level P (Area=0.5) | 0.0036         |

| Estimated sensitivity at fixed specificity |             |               |           |
|--------------------------------------------|-------------|---------------|-----------|
| Specificity                                | Sensitivity | 95% CI        | Criterion |
| 90.00                                      | 14.85       | 5.94 to 25.74 | >0.007436 |

| Criterion | Sensitivity | 95% CI      | Specificity | 95% CI      | +LR  | 95% CI    | -LR  | 95% CI    |
|-----------|-------------|-------------|-------------|-------------|------|-----------|------|-----------|
| >0.002223 | 82.18       | 73.3 - 89.1 | 43.75       | 32.7 - 55.3 | 1.46 | 1.2 - 1.8 | 0.41 | 0.3 - 0.7 |

**G**

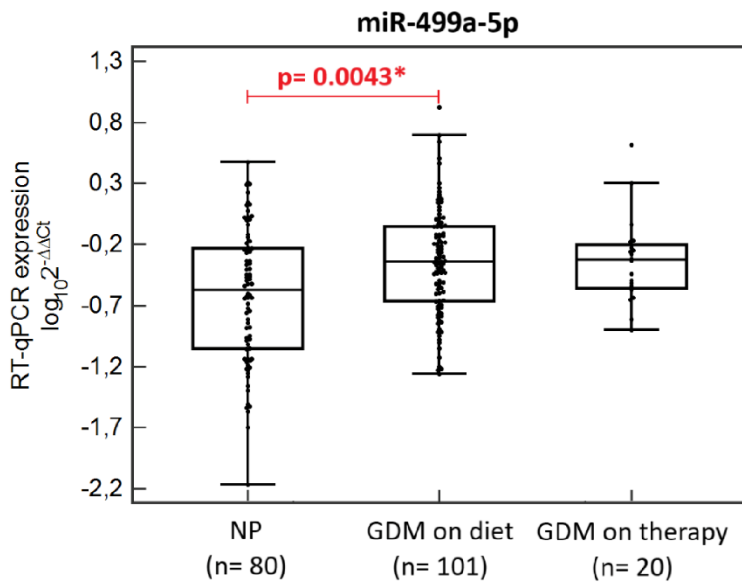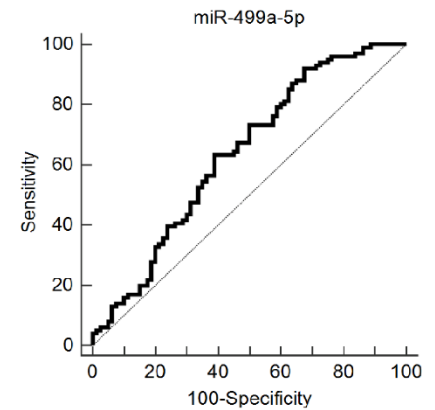

|                                 |                |
|---------------------------------|----------------|
| Area under the ROC curve (AUC)  | 0.637          |
| Standard Error                  | 0.0423         |
| 95% Confidence interval         | 0.562 to 0.707 |
| Significance level P (Area=0.5) | 0.0012         |

| Estimated sensitivity at fixed specificity |             |               |           |
|--------------------------------------------|-------------|---------------|-----------|
| Specificity                                | Sensitivity | 95% CI        | Criterion |
| 90.00                                      | 15.84       | 6.93 to 28.71 | >1.191424 |

| Criterion | Sensitivity | 95% CI      | Specificity | 95% CI      | +LR  | 95% CI    | -LR  | 95% CI    |
|-----------|-------------|-------------|-------------|-------------|------|-----------|------|-----------|
| >0.355789 | 63.37       | 53.2 - 72.7 | 61.25       | 49.7 - 71.9 | 1.64 | 1.2 - 2.2 | 0.60 | 0.4 - 0.8 |

H

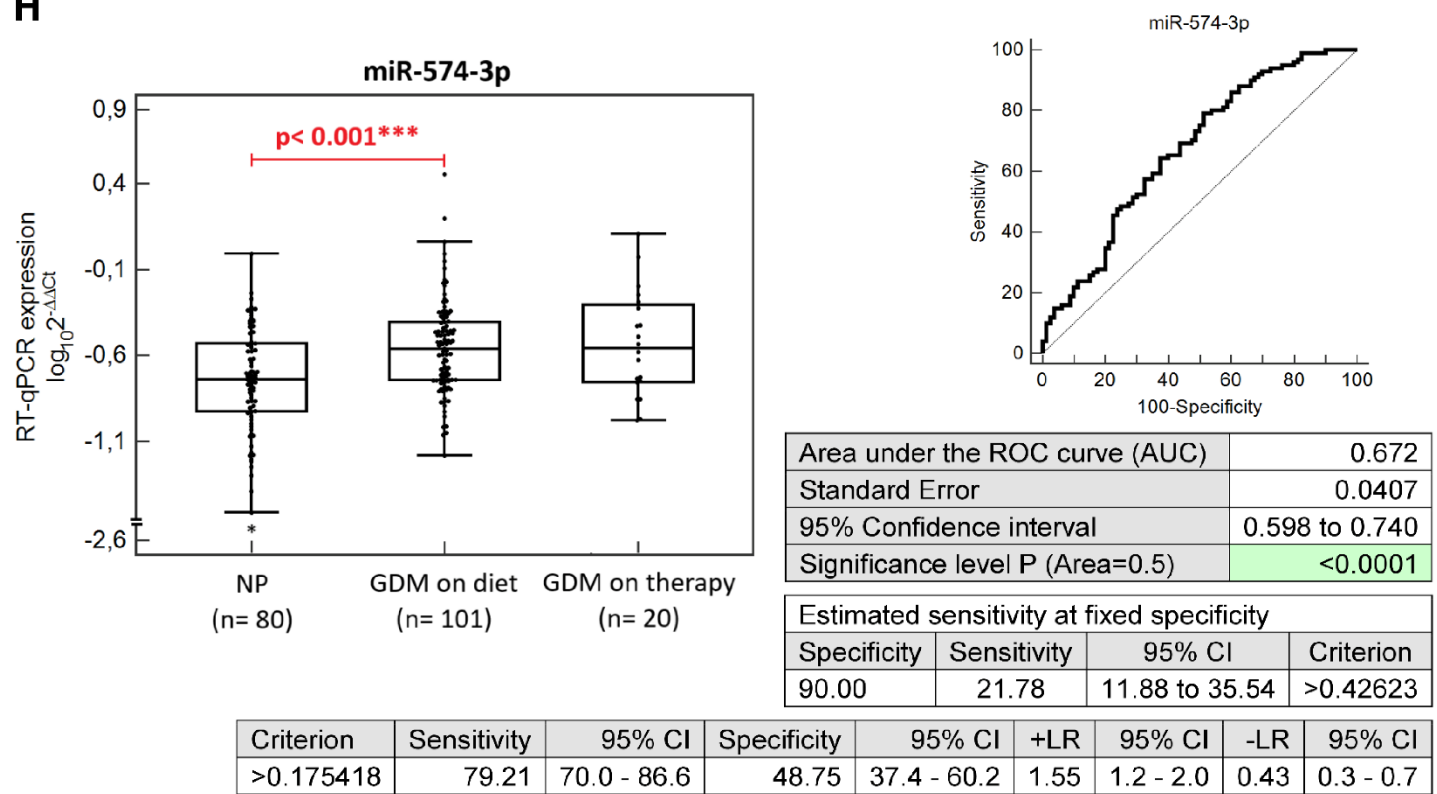

**Supplementary Figure S2.** Comparison of miRNAs gene expression in peripheral blood leukocytes in early stages of gestation between pregnancies with normal course and those with GDM with respect to the GDM treatment strategies (GDM pregnancies on diet only and GDM pregnancies requiring the combination of diet and administration of appropriate therapy). **A-C**, significant upregulation (after the Benjamini-Hochberg correction) of miR-20a-5p, miR-20b-5p, and miR-195-5p in both groups of pregnancies destined to develop GDM irrespective of the treatment strategies (on diet only or on the combination of diet and therapy); **D-H**, significant upregulation (after the Benjamini-Hochberg correction) of miR-1-3p, miR-100-5p, miR-125b-5p, miR-499-5p, and miR-574-3p in the group of pregnancies destined to develop GDM, which was well managed by diet only.
